# Supplementary material for: Global marine microbial diversity and its potential in bioprospecting
Source: PubMed Central journal article supplement — Nature. 2024 Sep 4;633(8029):371–9. doi: 10.1038/s41586-024-07891-2 (PMC11390488; doi:10.1038/s41586-024-07891-2), 2024-09-04
Supplement: 41586_2024_7891_MOESM1_ESM.pdf [file 41586_2024_7891_MOESM1_ESM.pdf]

**Supplementary information**

---

**Global marine microbial diversity and its potential in bioprospecting**

---

In the format provided by the authors and unedited

## Supplementary Information

### Global marine microbial diversity and its potential in bioprospecting

Jianwei Chen<sup>1,2,3,4,\*</sup>, Yangyang Jia<sup>2,\*</sup>, Ying Sun<sup>1,3,\*,#</sup>, Kun Liu<sup>5,\*</sup>, Changhao Zhou<sup>1</sup>, Chuan Liu<sup>2,4</sup>, Denghui Li<sup>1</sup>, Guilin Liu<sup>1</sup>, Chengsong Zhang<sup>5</sup>, Tao Yang<sup>6,7</sup>, Lei Huang<sup>2</sup>, Yunyun Zhuang<sup>8</sup>, Dazhi Wang<sup>9</sup>, Dayou Xu<sup>1</sup>, Qiaoling Zhong<sup>6</sup>, Yang Guo<sup>1,16</sup>, Anduo Li<sup>2</sup>, Inge Seim<sup>10</sup>, Ling Jiang<sup>11</sup>, Lushan Wang<sup>5</sup>, Simon Ming Yuen Lee<sup>12</sup>, Yujing Liu<sup>1,3</sup>, Dantong Wang<sup>1</sup>, Guoqiang Zhang<sup>5</sup>, Shanshan Liu<sup>1</sup>, Xiaofeng Wei<sup>6,7</sup>, Zhen Yue<sup>13</sup>, Shanmin Zheng<sup>5</sup>, Xuechun Shen<sup>2</sup>, Sen Wang<sup>5</sup>, Chen Qi<sup>2</sup>, Jing Chen<sup>7</sup>, Chen Ye<sup>2</sup>, Fang Zhao<sup>1</sup>, Jun Wang<sup>1</sup>, Jie Fan<sup>1,3</sup>, Baitao Li<sup>2</sup>, Jiahui Sun<sup>1</sup>, Xiaodong Jia<sup>14</sup>, Zhangyong Xia<sup>15</sup>, He Zhang<sup>1,2</sup>, Junian Liu<sup>1</sup>, Yue Zheng<sup>2</sup>, Xin Liu<sup>1,2</sup>, Jian Wang<sup>2</sup>, Huanming Yang<sup>2</sup>, Karsten Kristiansen<sup>2,3,4</sup>, Xun Xu<sup>1,2,3,17</sup>, Thomas Mock<sup>18,#</sup>, Shengying Li<sup>5,19,#</sup>, Wenwei Zhang<sup>2,17,#</sup>, Guangyi Fan<sup>1,2,3,17,#</sup>

<sup>1</sup> BGI Research, Qingdao 266555, China

<sup>2</sup> BGI Research, Shenzhen 518083, China

<sup>3</sup> Qingdao Key Laboratory of Marine Genomics, and Qingdao-Europe Advanced Institute for Life Sciences, BGI Research, Qingdao 266555, China

<sup>4</sup> Laboratory of Genomics and Molecular Biomedicine, Department of Biology, University of Copenhagen, Universitetsparken 13, 2100 Copenhagen, Denmark

<sup>5</sup> State Key Laboratory of Microbial Technology, Shandong University, Qingdao 266237, China

<sup>6</sup> China National GeneBank, BGI Research, Shenzhen 518120, China

<sup>7</sup> Guangdong Genomics Data Center, BGI Research, Shenzhen 518120, China

<sup>8</sup> Key Laboratory of Environment and Ecology, Ministry of Education, Ocean University of China, Qingdao 266100, China

<sup>9</sup> State Key Laboratory of Marine Environmental Science/College of the Environment and Ecology, Xiamen University, Xiamen 361005, China

<sup>10</sup> Marine Mammal and Marine Bioacoustics Laboratory, Institute of Deep-sea Science and Engineering, Chinese Academy of Sciences, Sanya 57200, China

<sup>11</sup> College of Food Science and Light Industry, Nanjing Tech University, Nanjing 211816, China

<sup>12</sup> State Key Laboratory of Chemical Biology and Drug Discovery, and Department of Food Science and Nutrition, The Hong Kong Polytechnic University, Hung Hom, Hong Kong, China

<sup>13</sup> BGI Research, Sanya 572025, China

<sup>14</sup> Joint Laboratory for Translational Medicine Research, Liaocheng People's Hospital, Liaocheng 252000, China

<sup>15</sup> Department of Neurology, the Second People's Hospital of Liaocheng, Liaocheng 252000, China

<sup>16</sup> Center of deep-Sea Research, Institute of Oceanology, Chinese Academy of Sciences, Qingdao 266071, China

<sup>17</sup> State Key Laboratory of Agricultural Genomics, BGI Research, Shenzhen 518083, China

<sup>18</sup> School of Environmental Sciences, University of East Anglia, Norwich Research Park, NR4 7TJ Norwich, UK

<sup>19</sup> Laboratory for Marine Biology and Biotechnology, Qingdao Marine Science and Technology Center, Qingdao 266237, China

\* These authors contributed equally.

# Correspondence: [fanguangyi@genomics.cn](mailto:fanguangyi@genomics.cn), [zhangww@genomics.cn](mailto:zhangww@genomics.cn), [lishengying@sdu.edu.cn](mailto:lishengying@sdu.edu.cn), [T.Mock@uea.ac.uk](mailto:T.Mock@uea.ac.uk) and [sunying6@genomics.cn](mailto:sunying6@genomics.cn)

|                                                                                                 |    |
|-------------------------------------------------------------------------------------------------|----|
| Supplementary Note 1.....                                                                       | 4  |
| Calculation of metagenomic community composition .....                                          | 4  |
| Calculation of spatial and environmental determinants of microbiome diversity .....             | 4  |
| Description of global marine microbiomes and their biogeography .....                           | 5  |
| Supplementary Note 2.....                                                                       | 7  |
| Comparison of GOMC large genomes with NCBI GenBank records.....                                 | 7  |
| Identification of functional features related to prokaryotic bacterial genome enlargement ..... | 8  |
| Validation of functional features related to bacterial genome enlargement across phyla .....    | 12 |
| Supplementary Figures .....                                                                     | 13 |
| Supplementary Tables.....                                                                       | 14 |
| Supplementary References.....                                                                   | 29 |

## Supplementary Note 1

### Calculation of metagenomic community composition

We used metagenomic data to calculate microbial community compositions across the global ocean to identify potential biogeographic patterns associated with taxonomic profiling and functional genes. Kraken2-build was used to construct a customized Kraken database using genomes constructed in this study, and then the metagenomic sequencing reads from 5,377 samples with explicit geographic location information were classified against the constructed database using Kraken2 (v2.1.2) with default parameters<sup>1</sup>. The read count profiles for each taxonomic level were calculated using Bracken (v2.5)<sup>2</sup>. Normalized species relative abundance table was imported into Seurat (v3.2.1) for the dimensionality reduction clustering using the uniform manifold approximation and projection (UMAP) method<sup>3,4</sup>.

Microbiome analyses and visualization related to metagenomic province features were primarily carried out by the phyloseq package (v3.17)<sup>5</sup> under the R environment<sup>6</sup>. Alpha diversity was measured by Shannon index<sup>7</sup> and the between-community distance assessed by the Jensen-Shannon divergence (JSD) index<sup>8</sup> was calculated based on the relative abundance profiles generated by Bracken, using the estimate\_richness and distance functions, respectively. Analysis of similarity (ANOSIM) based on the JSD measures was performed, using the anosim function of the pairwiseAdonis package (v0.4)<sup>9</sup>, to evaluate the microbial assemblage differences among metagenomic provinces.

Geographic distance between sampling sites was calculated using the distm function with the “distHaversine” option of the geosphere package (v1.5.18)<sup>10</sup>. Distance-decay relationship between microbial community dissimilarity, with regard to the JSD index, and geographic distance between samples was measured by the correlation coefficients of Mantel tests, using the mantel function of the vegan package (v2.6.4)<sup>11</sup>.

### Calculation of spatial and environmental determinants of microbiome diversity

The mean annual climatology data of temperature, salinity, dissolved oxygen, silicate, phosphate, nitrate, apparent oxygen utilization, conductivity, and density at a  $1^\circ \times 1^\circ$  resolution were collected from the World Ocean Atlas 2018 (WOA2018) database<sup>12,13</sup>. We categorized our seawater metagenomes into multiple ocean layers based on depths, including the surface (SRF; between 0 m and 10 m), the deep chlorophyll maximum (DCM; between 10 m and 200 m), the mesopelagic

(MES; between 200 m and 1,000 m), and the bathypelagic (BATH; between 1,000 m and 4,000 m) zones. Given that a large proportion of the metagenomes collected from NCBI SRA lacks clear depth information measured in meters, the environmental parameters for each sample were obtained by matching their longitude and latitude to their nearest neighbor on the  $1^\circ \times 1^\circ$  grid of WOA2018, extracting all the measures across a range of depths based on the ocean layer assigned to the sample, and then calculating the mean values as an approximation.

The influence of environmental parameters on the Shannon diversity of samples was explored by multivariable linear regressions using the `lm` function in the `stats` package (v4.2.2). Before the regression analysis, spearman correlations among different environmental parameters were calculated using the `cor` function in the `stats` package (**Fig. Environmental factors vs microbial community variation a**). Among the highly correlated environmental parameters, such as temperature, conductivity and density, only one was selected as the independent predictor variable for the downstream regression analyses. As a result, four environmental parameters were retained as independent predictors, including temperature, salinity, phosphate and dissolved oxygen. The skewness of the response variable (Shannon diversity) was estimated and multiple transformation methods were applied to improve its normality (**Fig. Environmental factors vs microbial community variation b**). Further, Mantel and partial Mantel tests were implemented to evaluate the effects of different environmental parameters on the beta diversity among samples, as measured by the JSD matrix, at different depths (**Fig. Environmental factors vs microbial community variation c**), using the `mantel` and `mantel.partial` functions of the `vegan` package, respectively. For the partial Mantel test, geographic distance between sampling sites was considered as the third control distance matrix.

### **Description of global marine microbiomes and their biogeography**

Different marine ecosystems appear to be home to distinct microbial communities likely because of environmental filtering (**Extended Data Fig. 3a**). For instance, whereas Proteobacteria are distributed across the water column from the surface to the deeper oceans, Cyanobacteria are enriched in the deep chlorophyll maximum (DCM) layers. Planctomycetota were relatively more abundant in the mesopelagic (MES) than in shallower waters. Chloroflexota and Marinisomatota were most abundant in meso- and bathypelagic (BATH) samples, suggesting their preference for the deeper ocean. Most widespread throughout the water column and all oceans was SAR324 with

abyssopelagic members, consistent with previously identified depth zonation patterns of its ecotypes<sup>14</sup>. Sediment communities were enriched with Desulfobacterota, one of the most ubiquitous sulfate-reducing bacteria in benthic environments. We identified an overall positive but weak correlation between geographical distances and the Jensen-Shannon divergence (JSD) between microbial communities from different depths (Mantel coefficients between 0.09 and 0.39,  $P < 0.01$ ), with surface water (SRF) communities showing the weakest correlation. This result might be attributed to thermohaline mixing and surface ocean currents. Usually, both processes are less pronounced in deeper waters. Correlations with physical environmental variables (e.g., temperature, salinity) generally showed a limited predictive ability for explaining differences in the Shannon diversity of microbial communities ( $P < 0.01$  but adjusted  $R^2 < 0.5$ ) (**Fig. Environmental factors vs microbial community variation ab**). However, macronutrients appear to be more influential on the diversity of microbial communities in the DCM zone (**Fig. Environmental factors vs microbial community variation c**), which is mainly occupied by phytoplankton<sup>15</sup>. To shed light on drivers shaping the bacterial community composition in the global ocean will require more accurate and comprehensive datasets on environmental conditions to identify potential deterministic biotic (e.g., predator-prey interactions) and likely also abiotic factors (e.g., novel resources used by microbes) which have not been accounted for yet<sup>16</sup>.

Despite the overarching patterns of microbial distribution observed across the water column, notable diversity persists in microbial communities within each distinct depth layer (**Extended Data Fig. 3a**). We identified 56 metagenomic provinces (MPs) using the uniform manifold approximation and projection (UMAP) method based on the relative abundance of MAGs in each sample<sup>17</sup> (**Extended Data Fig. 3b**). The geographical distribution of samples within MPs is illustrated in CNGBdb website (**Fig. UMAP biogeographical distribution**). In the large figure, each MP consists of three panels, from left to right, showing the microbial community composition of each sample, the location of samples in the UMAP dimensionality reduction space, and the geographic regions covered by the MP in the global ocean. Color scheme for taxonomic groups is the same as that in **Extended Figure 3a**. In the first panel: Samples were ordered based on their distance to the center of the MP cluster in the UMAP space increasingly. Above the stacked bar of each sample, a dot with different colors is used to show the depth layer to which the sample belongs. Color scheme for depth layers is also shown on top of the figure. The transparency of each dot is proportional to the distance between the specific sample and the center of the MP

cluster in the UMAP space. The closer that sample is to the center, the opaquer the dot is. In the second and third panels, the color and transparency of each sample were the same as for the dots in the first panel. Further, we assessed the degree of separation between MPs by an ANOSIM test on the Jensen-Shannon divergence (JSD) matrix ( $R = 0.61$ ,  $P < 0.01$ ). Generally, we found that Bacteroidia, Alpha- and Gammaproteobacteria were prevalent in many MPs<sup>18,19</sup>, whereas others were only abundant in particular ecosystems, such as Campylobacterota mainly occurring at deep-sea hydrothermal vents<sup>20</sup>. This large-scale biogeographical partitioning highlights the global influence on the distribution of marine microorganisms. The significant variation observed in the MPs across different depths suggests a complex interplay of environmental factors shaping microbial communities in the open ocean. The fact that these MPs transcend geographically clustered sampling sites indicates that the patterns we observed are not limited to specific regions but are indicative of broader processes governing oceanic microbial dynamics.

## Supplementary Note 2

### Comparison of GOMC large genomes with NCBI GenBank records

Genome size was further adjusted for completeness and contamination using the same methodology employed in the previous publications<sup>21,22</sup> with the formula *Estimated Genome Size* = *Genome Size* / *Completeness* × (100 - *Contamination*). To gain a comprehensive view of the sizes of publicly available prokaryotic bacterial and archaeal assemblies, we acquired their summary report with metadata from the NCBI FTP site. As of July 2nd, 2023, NCBI has made available 1,608,241 latest GenBank prokaryotic bacterial and archaeal assemblies, of which 99.57% exhibit a genome size not exceeding 8 Mb (**Fig. GOMC large bacterial genomes a**). We identified 26 prokaryotic bacterial genomes exceeding 15 Mb in the NCBI GenBank archive and retrieved their genome sequences for further comparison. Among them, four were sampled from marine related environments (**Fig. GOMC large bacterial genomes a**).

We implemented the entropy-based method GUNC (v1.0.5) to evaluate genome chimerism<sup>23</sup> and CheckM to assess completeness and redundancy among our 3 *Pirellulaceae* MAGs larger than 16 Mb as well as the aforementioned 26 NCBI large genomes. The MAGs whose clade separation scores (CSS) higher than 0.45 and reference representation scores (RRS) greater than 0.5 were regarded as chimeric<sup>23</sup>. Additionally, the MAGs whose QS fell below 50 also failed to meet the quality criteria. Our three large *Pirellulaceae* MAGs successfully passed both the GUNC and



CheckM evaluations, suggesting they may constitute the largest marine prokaryotic bacterial genomes so far (**Fig. GOMC large bacterial genomes a**).

A total of 192 MAGs from the GOMC database were assigned to the Pirellulaceae family. Their phylogenetic position within the family Pirellulaceae was determined by the *de\_novo\_wf* function of the GTDB-Tk toolkit (v2.1.1)<sup>24</sup> with the GTDB database (v207)<sup>25</sup> using the family Lacipirellulaceae as the outgroup (`--taxa_filter f_Pirellulaceae --outgroup_taxon f_Lacipirellulaceae`) (**Fig. GOMC large bacterial genomes b**). The phylogenetic relationship of our three large MAGs and their closely related species underwent additional validation through the following steps: First, 27 genomes in the adjacency of our target large genomes, marked by a green strip, were selected according to the species tree built by GTDB-Tk, along with an outgroup genome from the family Lacipirellulaceae; Second, ORFs were annotated as mentioned above and then OrthoFinder (v2.5.4) was used to cluster orthologous proteins among the 31 genomes<sup>26</sup>; Third, 314 single-copy orthologous protein families (OGs) shared by at least 28 out of the 31 genomes were selected; Forth, protein sequences in each family were aligned using MAFFT (v7.407) and excessive gaps were removed by TrimAl (-gappyout). The 314 alignments were concatenated into a super alignment for phylogeny construction; Last, Maximum likelihood phylogenetic inference under the best-fit partition model was performed by IQ-Tree with 1,000 replicates (v2.1.4-beta; -m TESTMERGE -bb 1000)<sup>27</sup> (**Fig. GOMC large bacterial genomes c**).

### **Identification of functional features related to prokaryotic bacterial genome enlargement**

To investigate potential genetic features that distinguish our three large Pirellulaceae MAGs from others exhibiting smaller genome sizes, we examined how the number of specific functional families in the genome relates to its size through phylogenetic regression analysis. First, we focused on the monophyletic clade of the nine genomes as shown in **Fig. GOMC large bacterial genomes c**, because the two sister clades demonstrated discernible differences in genome sizes, making them an ideal case for conducting phylogeny-controlled comparisons. Subsequent paragraphs provide detailed descriptions of the procedures employed for function assignment and statistical analyses.

Functional annotation was performed with the Pfam (v35.0) database<sup>28</sup> using Hidden Markov models (HMMs)-based homology searches. The *hmmsearch* program (HMMER v3.3.2) was carried out against the Pfam profiles with the “`--cut_ga`” flag. To identify a domain within a protein, specific criteria were applied: the homologous hit score had to surpass the gathering threshold

established by the curated Pfam models; the e-value had to be below 0.001; and the number of domains satisfying the inclusion thresholds had to exceed zero. Noteworthy, the proteins under consideration were permitted to comprise multiple Pfam functional domains. Then, a matrix was constructed, where rows represented Pfam families, columns represented genomes, and each cell denoted the gene count assigned to a specific family within that genome.

To mitigate the impact of evolutionary distances on correlation estimates between genetic features and genome sizes, we employed phylogenetic regression (PR) analyses<sup>29</sup>, accounting for the likelihood of increased similarity among closely related species due to shared phylogenetic ancestry. For each Pfam family, we utilized the `phylolm` function in the R package `phylolm`<sup>30</sup> with a lambda model of phylogenetic covariance<sup>31</sup>. The lambda values measure the strength of the phylogenetic signal with 0 indicating no effect and 1 standing for a strong effect of phylogeny. We controlled for both adjusted  $R^2$  and FDR-adjusted p-values<sup>32</sup> to identify functional families exhibiting significant correlations with genome sizes. The results are shown in **Extended Data Fig. 4b** as a volcano plot displays the regression coefficients of gene count against their corresponding FDR values resulted from the PR analysis. Each point in the volcano plot represents a functional family (a Pfam domain). Points are colored according to their corresponding lambda values, indicating the strength of phylogenetic signal over the regression. The size of each point represents the corresponding  $R^2$  value. The x-axis shows the regression coefficient of the phylogenetic regression upon each Pfam domain. The y-axis displays the corresponding FDR values after a negative log10 transformation. The horizontal dashed line marks the FDR value of 0.05. The vertical dashed line marks the regression coefficient of 0. The PR approach pinpointed 604 Pfam domains displaying a notably significant positive correlation with genome size, which remains statistically robust even when accounting for phylogenetic associations ( $R^2 \geq 0.5$ , false discovery rate [FDR] < 0.05 and regression coefficient > 0).

Ancestral genomes were inferred with AnGST<sup>33</sup> based on OGs identified by OrthoFinder as mentioned above. The default penalty scores of horizontal gene transfer (HGT) (= 3), gene duplication (= 2), gene loss (= 1) and speciation (= 0) were adopted as suggested in the original paper to minimize genome size flux<sup>33</sup>. Only OGs presenting in all the four large genomes of our target clade (highlighted in yellow in **Extended Data Fig. 4b**) were used in this analysis. Gene trees of each OG were built using IQ-Tree with 1,000 replicates (-m TEST -bb 1000 -bnni)<sup>27</sup>. AnGST infers evolutionary events by the reconciliation of topological incongruences between the

gene trees and the species tree under a parsimony framework<sup>33</sup>. We analyzed the genome contents of three ancestral genomes, including the last common ancestor (LCA) of our target clade (LCA1), the LCA of its sister clade (LCA2) and the LCA of both clades (LCA0) (**Extended Data Fig. 4b**). To identify OGs experiencing ancient expansions, specific criteria were applied (as described in pseudocode in **Extended Data Fig. 4b**): the gene counts of the OG at LCA1 were supposed to be greater than those at both LCA0 and LCA2; and in all the extant genomes, the gene counts of the OG in each large genome of the target clade must outnumbered those in the genomes of its sister clade. A comprehensive set of 1,005 OGs potentially underwent ancient expansion in gene counts at LCA1. Further, we summarized the Pfam families annotated in each gene of the chosen OGs. We expected to see an increment of specific Pfam families alongside the expansion of OGs and defined the vote for a Pfam domain as the fraction of genes in an OG that was assigned to that domain. The votes for a Pfam family were added up across all the chosen OGs and Pfam families with a vote higher than 3 were selected. In line with this proposition, we recognized 92 expanded Pfam domains.

So far, the selection of Pfam families related to genome enlargement, using phylogenetic regression analyses and ancestral genome content inferences, was mainly based on the *Pirellulaceae* large genomes and their close relatives. We subsequently extended our analysis to encompass the entire GOMC dataset of 24,195 genomes. We aimed to identify Pfam families for which an increase in genome size was associated with a higher count of genes annotated within that specific Pfam family. An illustrative instance is presented in **Extended Data Fig. 4b**, considering the Pfam family denoted as "PF13360": firstly, genomes featuring a sole gene attributed to the PF13360.9 family exhibited a statistically significant increase in size compared to those lacking genes associated with PF13360 (determined by a Wilcoxon rank-sum test with the alternative set to "greater"); secondly, genomes hosting two PF13360 genes surpassed the size of genomes containing only one instance of the PF13360 gene; furthermore, genomes containing a minimum of three PF13360 genes exceeded the size of genomes harboring two copies of the PF13360 gene. A total of 2,583 Pfam families were selected according to these criteria. Finally, 77 designated Pfams involved in genome stability, cell cycle progression, signal transduction and regulation were identified as related to the genome expansion (**Extended Data Fig. 4b**). The 77 designated Pfams are PF00037 (Fer4 [24aa] (4Fe-4S binding domain)), PF00069 (Pkinase [264aa] (Protein kinase domain)), PF00072 (Response\_reg [112aa] (Response regulator receiver domain)),

PF00092 (VWA [175aa] (von Willebrand factor type A domain)), PF00135 (COesterase [515aa] (Carboxylesterase family)), PF00149 (Metallophos [205aa] (Calcineurin-like phosphoesterase)), PF00326 (Peptidase\_S9 [212aa] (Prolyl oligopeptidase family)), PF00400 (WD40 [38aa] (WD domain, G-beta repeat)), PF00474 (SSF [406aa] (Sodium:solute symporter family)), PF00571 (CBS [57aa] (CBS domain)), PF00583 (Acetyltransf\_1 [117aa] (Acetyltransferase (GNAT) family)), PF00795 (CN\_hydrolase [261aa] (Carbon-nitrogen hydrolase)), PF00884 (Sulfatase [309aa] (Sulfatase)), PF00890 (FAD\_binding\_2 [417aa] (FAD binding domain)), PF00989 (PAS [113aa] (PAS fold)), PF01011 (PQQ [38aa] (PQQ enzyme repeat)), PF01073 (3Beta\_HSD [280aa] (3-beta hydroxysteroid dehydrogenase/isomerase family)), PF01120 (Alpha\_L\_fucos [350aa] (Alpha-L-fucosidase)), PF01134 (GIDA [392aa] (Glucose inhibited division protein A)), PF01208 (URO-D [345aa] (Uroporphyrinogen decarboxylase (URO-D))), PF01209 (Ubie\_methyltran [233aa] (ubiE/COQ5 methyltransferase family)), PF01261 (AP\_endonuc\_2 [250aa] (Xylose isomerase-like TIM barrel)), PF01370 (Epimerase [241aa] (NAD dependent epimerase/dehydratase family)), PF01408 (GFO\_IDH\_MocA [120aa] (Oxidoreductase family, NAD-binding Rossmann fold)), PF01656 (CbiA [127aa] (CobQ/CobB/MinD/ParA nucleotide binding domain)), PF01663 (Phosphodiast [357aa] (Type I phosphodiesterase / nucleotide pyrophosphatase)), PF01738 (DLH [217aa] (Dienelactone hydrolase family)), PF02518 (HATPase\_c [112aa] (Histidine kinase-, DNA gyrase B-, and HSP90-like ATPase)), PF02837 (Glyco\_hydro\_2\_N [169aa] (Glycosyl hydrolases family 2, sugar binding domain)), PF03130 (HEAT\_PBS [27aa] (PBS lyase HEAT-like repeat)), PF03629 (SASA [226aa] (Carbohydrate esterase, sialic acid-specific acetylcetate)), PF03781 (FGE-sulfatase [260aa] (Sulfatase-modifying factor enzyme 1)), PF04055 (Radical\_SAM [167aa] (Radical SAM superfamily)), PF04909 (Amidohydro\_2 [288aa] (Amidohydrolase)), PF05048 (NosD [210aa] (Periplasmic copper-binding protein (NosD))), PF05448 (AXE1 [318aa] (Acetyl xylan esterase (AXE1))), PF05569 (Peptidase\_M56 [299aa] (BlaR1 peptidase M56)), PF06283 (ThuA [210aa] (Trehalose utilisation)), PF06439 (3keto-disac\_hyd [185aa] (3-keto-disaccharide hydrolase)), PF07638 (Sigma70\_ECF [185aa] (ECF sigma factor)), PF07676 (PD40 [38aa] (WD40-like Beta Propeller Repeat)), PF07690 (MFS\_1 [353aa] (Major Facilitator Superfamily)), PF07714 (PK\_Tyr\_Ser-Thr [259aa] (Protein tyrosine and serine/threonine kinase)), PF07859 (Abhydrolase\_3 [211aa] (alpha/beta hydrolase fold)), PF07940 (Hepar\_II\_III [237aa] (Heparinase II/III-like protein)), PF07944 (Glyco\_hydro\_127 [508aa] (Beta-L-arabinofuranosidase, GH127)), PF08241

(Methyltransf\_11 [96aa] (Methyltransferase domain)), PF08281 (Sigma70\_r4\_2 [54aa] (Sigma-70, region 4)), PF08448 (PAS\_4 [110aa] (PAS fold)), PF12706 (Lactamase\_B\_2 [201aa] (Beta-lactamase superfamily domain)), PF12831 (FAD\_oxidored [427aa] (FAD dependent oxidoreductase)), PF12838 (Fer4\_7 [52aa] (4Fe-4S dicluster domain)), PF13088 (BNR\_2 [275aa] (BNR repeat-like domain)), PF13174 (TPR\_6 [33aa] (Tetratricopeptide repeat)), PF13181 (TPR\_8 [34aa] (Tetratricopeptide repeat)), PF13183 (Fer4\_8 [65aa] (4Fe-4S dicluster domain)), PF13188 (PAS\_8 [67aa] (PAS domain)), PF13202 (EF-hand\_5 [25aa] (EF hand)), PF13229 (Beta\_helix [158aa] (Right handed beta helix region)), PF13360 (PQQ\_2 [237aa] (PQQ-like domain)), PF13385 (Laminin\_G\_3 [151aa] (Concanavalin A-like lectin/glucanases superfamily)), PF13426 (PAS\_9 [104aa] (PAS domain)), PF13432 (TPR\_16 [68aa] (Tetratricopeptide repeat)), PF13450 (NAD\_binding\_8 [68aa] (NAD(P)-binding Rossmann-like domain)), PF13489 (Methyltransf\_23 [165aa] (Methyltransferase domain)), PF13517 (FG-GAP\_3 [61aa] (FG-GAP-like repeat)), PF13519 (VWA\_2 [108aa] (von Willebrand factor type A domain)), PF13534 (Fer4\_17 [61aa] (4Fe-4S dicluster domain)), PF13570 (PQQ\_3 [40aa] (PQQ-like domain)), PF13646 (HEAT\_2 [88aa] (HEAT repeats)), PF13649 (Methyltransf\_25 [97aa] (Methyltransferase domain)), PF13768 (VWA\_3 [155aa] (von Willebrand factor type A domain)), PF16347 (DUF4976 [103aa] (Domain of unknown function (DUF4976))), PF16363 (GDP\_Man\_Dehyd [332aa] (GDP-mannose 4,6 dehydratase)), PF17132 (Glyco\_hydro\_106 [742aa] (alpha-L-rhamnosidase)), PF18582 (HZS\_alpha [102aa] (Hydrazine synthase alpha subunit middle domain)), PF20434 (BD-FAE [215aa] (BD-FAE)).

### **Validation of functional features related to bacterial genome enlargement across phyla**

We assessed the persistence of the positive correlations between the 77 chosen Pfam domains and genome size across a broader taxonomic spectrum (**Extended Data Fig. 4b** and **Extended Data Fig. 5a,b**). To achieve this, we conducted supplementary analyses employing high-quality genomes (with completeness  $\geq 70\%$  and contamination  $\leq 10\%$ ) sourced from 9 phyla. These 9 phyla were selected due to their possession of a minimum of 5 genomes exceeding 8 Mb in size, aligning with the context of our preliminary findings. Employing the same methodology as previously described, we performed phylogenetic regression analyses on the 77 selected Pfam domains across the genomes within each of these phyla.

## Supplementary Figures

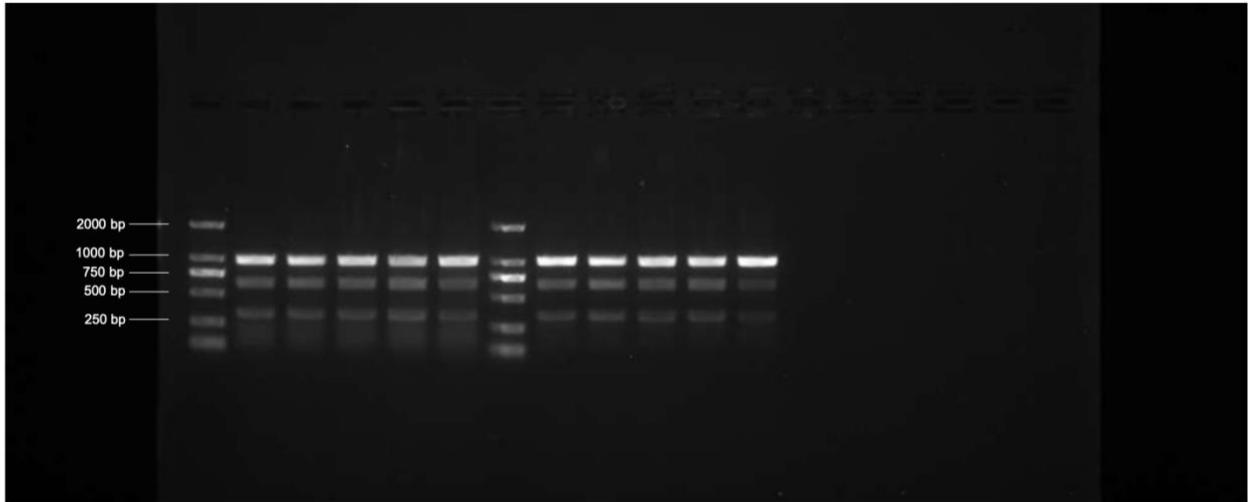

**Supplementary Fig. 1** | Uncropped agarose gel electrophoresis of *in vitro* dsDNA cleavage products of the *AASVI* gene fragments for the Om1Cas9 (left) and SpCas9 (right), respectively.







|                                       |                                                                                                        |         |                                                                                                                                                                                                                                                                                                                                                                                                                                                                                                                                                                                                                                                                                                                                                                                                                                                                                                                                                                                                                                                                                                                                                                                     |                                                                                                                  |           |
|---------------------------------------|--------------------------------------------------------------------------------------------------------|---------|-------------------------------------------------------------------------------------------------------------------------------------------------------------------------------------------------------------------------------------------------------------------------------------------------------------------------------------------------------------------------------------------------------------------------------------------------------------------------------------------------------------------------------------------------------------------------------------------------------------------------------------------------------------------------------------------------------------------------------------------------------------------------------------------------------------------------------------------------------------------------------------------------------------------------------------------------------------------------------------------------------------------------------------------------------------------------------------------------------------------------------------------------------------------------------------|------------------------------------------------------------------------------------------------------------------|-----------|
|                                       | II-III-IV-V-VI,Cas4_0_I-II                                                                             |         | YTSQVKLQALYDENNKTYKKTIDVNMKTDNDKGDFTKLDVRSYKLTMRFAESSLIVYPAIASWNLLEHDFVKAAGKKEAFDSDSYNRVIKLGFSTIKENTRQHKVRKNWSLPLKSSPSGGYRARRNKDAGSIHQFVAEGLSAGSFGIDGKIDFSEAGVAGIKADDSKSLTSVRSYKNIQPLVPEFDFNRRVITPDKLKGKIKGILLSRFSRFRVIEFSYGFQKFNVLPTDISELVAQVSOQPAELKMAKGEKAWASFGDLGTPRNSFLVIGTISLITLEYGSSNTVMKQAYQNGSLID                                                                                                                                                                                                                                                                                                                                                                                                                                                                                                                                                                                                                                                                                                                                                                                                                                                                          |                                                                                                                  |           |
| GCA_001998885.1_ASM199888v1_ge nomic  | Cas9_0_II,Cas1_4_CAS-I-II-III-IV-V-VI,Cas2_5_CAS-I-II-III-IV-V-VI,Csn2_2_CAS-II-A                      | 1132 aa | MKIDISVNLGFDIGASVGVWALNNAANGKILSEGVSEFSSAERNAERRSFRQSRRLVRRNRVRLHDMKDLLEKAGFPYTPKHQYIPNPLVRLKGLTQELTKEELALALYHLVRRKRGISYDLKDVDEDTGKNSSAYQESLQKNTLLKRLTPGHIQLNRLKNEGKVRGQIVDEDEGTLLNVPFTADYRDEAMILLSQOQFPYNTDEFKQVSEITKRREYFKGPGSLKSPDYGYKDDGTVDLNLLELIGDKDIPFSEYRAASNSYTAQLNLLNDLNLRIDTDEGKLTTHKEEHHYHLTKDDKKNLMLAISQVYTGAEQTHKGFGRIDRDDPEWISLAIYRKRCSNFAELGIDVATWPTLLDLDLGRILLTINTEGIERRALTEKFKKEYYPLTESLVDITMIONKQWHPFSLKMSLLIPEMLVTSKEQMILLYDLGLIKEDNIEYETQNLPHILADLVNYPVRRKSVQTKMFINALYQKYPNQYIAEMPRDITNEDEKQKQEFKQKNEQKDKAYLEFLSLSGVSETELNNKIKYKKNLRTMRLWYQQGQCFPSGPMPEADLSTPNYEDHIFHSYVSDSDSNNKVLFCFANMNEQKQKSTPYEMMQNGHGQSFASLKAMVAKNKRMDNTKKNLLFTELSDIDVRRKFIARNLVDTRYASRVNLELQPFVKGQNDLTKVTVVRGKFTVLRKRWSINKTRDTHHHADAIAVAVPTLIRWKKENAVIHPKQVEHLEDEPTGELDKETFEREAYTPPHLEEDVRLQAPTRIKETHQVDDKMNRSKIDATYSTROVQLGDKDQPADYVLDKIKDYSVDGKVFVETKDDAKFMMYRIDPKTEHLLQVATYDVEEVLSPNGKVRQEVSEPLVYRQNGVWVKYKQKQNGPAVQLAYYKLLKSGKIDITPKNFKGKVVQLSLSPWRTDYNDVTSYEMGKISYDLTGKCGYQKREKREYEEKTDEKVASAESCFMFLSYRNRKIVDVTDETEVLLFSGRLTNPQKGYVLEKPKDKAKFDSKEVVSFGVTPNGQHKRFLKKNYLLKYINTDVLGNPFYVKKEGENRFDIIDDN                                                                                 | [GTTTGGGAAGCATCAAAACAGCATCACTAAAAAC][GTTTTGTACTTAAAGATTTAGTACCGGTAACAC]                                          | Qualified |
| GCA_003987515.1_ASM398751v1_ge nomic  | Csn2_2_CAS-II-A,Cas2_5_CAS-I-II-III-IV-V-VI,Cas1_4_CAS-I-II-III-IV-V-VI,Cas9_0_II                      | 1132 aa | MKIDISVNLGFDIGASVGVWALNNAANGKILSEGVSEFSSAERNAERRSFRQSRRLVRRNRVRLHDMKDLLEKAGFPYTPKHQYIPNPLVRLKGLTQELTKEELALALYHLVRRKRGISYDLKDVDEDTGKNSSAYQESLQKNTLLKRLTPGHIQLNRLKNEGKVRGQIVDEDEGTLLNVPFTADYRDEAMILLSQOQFPYNTDEFKQVSEITKRREYFKGPGSLKSPDYGYKDDGTVDLNLLELIGDKDIPFSEYRAASNSYTAQLNLLNDLNLRIDTDEGKLTTHKEEHHYHLTKDDKKNLMLAISQVYTGAEQTHKGFGRIDRDDPEWISLAIYRKRCSNFAELGIDVATWPTLLDLDLGRILLTINTEGIERRALTEKFKKEYYPLTESLVDITMIONKQWHPFSLKMSLLIPEMLVTSKEQMILLYDLGLIKEDNIEYETQNLPHILADLVNYPVRRKSVQTKMFINALYQKYPNQYIAEMPRDITNEDEKQKQEFKQKNEQKDKAYLEFLSLSGVSETELNNKIKYKKNLRTMRLWYQQGQCFPSGPMPEADLSTPNYEDHIFHSYVSDSDSNNKVLFCFANMNEQKQKSTPYEMMQNGHGQSFASLKAMVAKNKRMDNTKKNLLFTELSDIDVRRKFIARNLVDTRYASRVNLELQPFVKGQNDLTKVTVVRGKFTVLRKRWSINKTRDTHHHADAIAVAVPTLIRWKKENAVIHPKQVEHLEDEPTGELDKETFEREAYTPPHLEEDVRLQAPTRIKETHQVDDKMNRSKIDATYSTROVQLGDKDQPADYVLDKIKDYSVDGKVFVETKDDAKFMMYRIDPKTEHLLQVATYDVEEVLSPNGKVRQEVSEPLVYRQNGVWVKYKQKQNGPAVQLAYYKLLKSGKIDITPKNFKGKVVQLSLSPWRTDYNDVTSYEMGKISYDLTGKCGYQKREKREYEEKTDEKVASAESCFMFLSYRNRKIVDVTDETEVLLFSGRLTNPQKGYVLEKPKDKAKFDSKEVVSFGVTPNGQHKRFLKKNYLLKYINTDVLGNPFYVKKEGENRFDIIDDN                                                                                 | GTTTTACCGTTAC TAAATTTTAAAGATCAAAAC                                                                               | Qualified |
| GCA_000165505.1_ASM16550v1_gen omic   | Cas2_5_CAS-I-II-III-IV-V-VI,Cas1_4_CAS-I-II-III-IV-V-VI,Cas9_1_II,CasR_1_CAS-I-II-III-IV-V-VI,Cas3_1_I | 1092 aa | MKYSIGLDIGASVGVWVINKDKERIEDMGVRFQKAEKPNKDGSSLASSRREKRSRRNRNRKXHLDRINKNLCESGLVKKNEIKYKNAYLKSPWELRAKSLKAKSNKEIAQILLHIAKRRGKFSFRKTRDNRADDTGKLLSGQENKIMEEKGYLTIDGMVAKDPKFNTHVRNKAGSYLSPFSRKLLEDEVRKIQKQKELGNTHTFDVLEKYEIVNSQRNPFDEGSPKSPYSEIQAGMIGNCTESESSEKTAANTWGSERFVFLQKLNFRVILGSGRKLTEEBERDVEKEVYLKKEVRYEKLKRLYLKEEFPDGLNYSKDEKQDKTEKTKFSLIGNYTKLNLSEKLSSEEFBDSKLDKIELITPKSDKTESLKKLLESEDEHLLSEFSGTLNLSLKAAILPKYLEGLSYNEACEADYDKNNGKFKRGLLPPVDDKDLANPVVRAISQTRKVNNAIRKYQTPHTHVEYARDLAKSYDDROTIKENKRELENEKTKFSEIEFGIKNVKGLLKYRLYQEOGRCYASRKELSLSEVLDSEMTDIDHIFYSRMSDSDSYNKLVLSGENRKNLPEYDROGGRDWTFLVNLVAKM KIHPRKSNLLEKFTREDNKDWSRALNDRYISRFVAYLENALEYRDSPPKRVFMPQQLTAQLARWRNLNRENGDLHHLDAVAVVDQKANNISNSRYKELKCKDVPISIEYHDADETEGVYEEVYKDFRFPWSPWSDGDELEKQRLSESEPREFYNLSDKRYLGVNVEEGHEKLRPVFSRMPNRRGVGQAHQETRSKSKSNQIASVSKPLNLSKLDLEKMOGRDTRKLYEALKNRLIEYDDPEKFAEFPYKPNSGRKLPLVREGVKEEQNGVYVYNGGQASNGSMVRDVRKNGKGYTVPIYHQTLKELPNRAINGKPYKDWLDLGSFEFLYSPYNDLIEIEFGKSKSNKNDKLTKEIPEVNLSEVLGYRGMDSGTAAITDTPDQKIGKIRIGIKTVKNKIKYQVYVGLNVYKVKREKRFIT                                                                                                                                      | GTTGTACTTCCTCAAITATTTTAGCTATGTTACAAT                                                                             | Qualified |
| GOMC.bin.20170                        | Cas2_5_CAS-I-II-III-IV-V-VI,Cas1_4_CAS-I-II-III-IV-V-VI,Cas9_1_II,CasR_1_CAS-I-II-III-IV-V-VI,Cas3_1_I | 1092 aa | MKYSIGLDIGASVGVWVINKDKERIEDMGVRFQKAEKPNKDGSSLASSRREKRSRRNRNRKXHLDRINKNLCESGLVKKNEIKYKNAYLKSPWELRAKSLKAKSNKEIAQILLHIAKRRGKFSFRKTRDNRADDTGKLLSGQENKIMEEKGYLTIDGMVAKDPKFNTHVRNKAGSYLSPFSRKLLEDEVRKIQKQKELGNTHTFDVLEKYEIVNSQRNPFDEGSPKSPYSEIQAGMIGNCTESESSEKTAANTWGSERFVFLQKLNFRVILGSGRKLTEEBERDVEKEVYLKKEVRYEKLKRLYLKEEFPDGLNYSKDEKQDKTEKTKFSLIGNYTKLNLSEKLSSEEFBDSKLDKIELITPKSDKTESLKKLLESEDEHLLSEFSGTLNLSLKAAILPKYLEGLSYNEACEADYDKNNGKFKRGLLPPVDDKDLANPVVRAISQTRKVNNAIRKYQTPHTHVEYARDLAKSYDDROTIKENKRELENEKTKFSEIEFGIKNVKGLLKYRLYQEOGRCYASRKELSLSEVLDSEMTDIDHIFYSRMSDSDSYNKLVLSGENRKNLPEYDROGGRDWTFLVNLVAKM KIHPRKSNLLEKFTREDNKDWSRALNDRYISRFVAYLENALEYRDSPPKRVFMPQQLTAQLARWRNLNRENGDLHHLDAVAVVDQKANNISNSRYKELKCKDVPISIEYHDADETEGVYEEVYKDFRFPWSPWSDGDELEKQRLSESEPREFYNLSDKRYLGVNVEEGHEKLRPVFSRMPNRRGVGQAHQETRSKSKSNQIASVSKPLNLSKLDLEKMOGRDTRKLYEALKNRLIEYDDPEKFAEFPYKPNSGRKLPLVREGVKEEQNGVYVYNGGQASNGSMVRDVRKNGKGYTVPIYHQTLKELPNRAINGKPYKDWLDLGSFEFLYSPYNDLIEIEFGKSKSNKNDKLTKEIPEVNLSEVLGYRGMDSGTAAITDTPDQKIGKIRIGIKTVKNKIKYQVYVGLNVYKVKREKRFIT                                                                                                                                      | GTTGTACTTCCTCAAITATTTTAGCTATGTTACAAT                                                                             | Qualified |
| GOMC.bin.4712                         | Cas3_1_I,CasR_1_CAS-I-II-III-IV-V-VI,Cas9_1_II,Cas1_4_CAS-I-II-III-IV-V-VI,Cas2_5_CAS-I-II-III-IV-V-VI | 1092 aa | MKYSIGLDIGASVGVWVINKDKERIEDMGVRFQKAEKPNKDGSSLASSRREKRSRRNRNRKXHLDRINKNLCESGLVKKNEIKYKNAYLKSPWELRAKSLKAKSNKEIAQILLHIAKRRGKFSFRKTRDNRADDTGKLLSGQENKIMEEKGYLTIDGMVAKDPKFNTHVRNKAGSYLSPFSRKLLEDEVRKIQKQKELGNTHTFDVLEKYEIVNSQRNPFDEGSPKSPYSEIQAGMIGNCTESESSEKTAANTWGSERFVFLQKLNFRVILGSGRKLTEEBERDVEKEVYLKKEVRYEKLKRLYLKEEFPDGLNYSKDEKQDKTEKTKFSLIGNYTKLNLSEKLSSEEFBDSKLDKIELITPKSDKTESLKKLLESEDEHLLSEFSGTLNLSLKAAILPKYLEGLSYNEACEADYDKNNGKFKRGLLPPVDDKDLANPVVRAISQTRKVNNAIRKYQTPHTHVEYARDLAKSYDDROTIKENKRELENEKTKFSEIEFGIKNVKGLLKYRLYQEOGRCYASRKELSLSEVLDSEMTDIDHIFYSRMSDSDSYNKLVLSGENRKNLPEYDROGGRDWTFLVNLVAKM KIHPRKSNLLEKFTREDNKDWSRALNDRYISRFVAYLENALEYRDSPPKRVFMPQQLTAQLARWRNLNRENGDLHHLDAVAVVDQKANNISNSRYKELKCKDVPISIEYHDADETEGVYEEVYKDFRFPWSPWSDGDELEKQRLSESEPREFYNLSDKRYLGVNVEEGHEKLRPVFSRMPNRRGVGQAHQETRSKSKSNQIASVSKPLNLSKLDLEKMOGRDTRKLYEALKNRLIEYDDPEKFAEFPYKPNSGRKLPLVREGVKEEQNGVYVYNGGQASNGSMVRDVRKNGKGYTVPIYHQTLKELPNRAINGKPYKDWLDLGSFEFLYSPYNDLIEIEFGKSKSNKNDKLTKEIPEVNLSEVLGYRGMDSGTAAITDTPDQKIGKIRIGIKTVKNKIKYQVYVGLNVYKVKREKRFIT                                                                                                                                      | ATTGAAACATAGTAAATAATGAGGAAAGTACAAC                                                                               | Qualified |
| MARD_SAMN04488102_REFG_MM P04488102   | Csn2_10_CAS-II-A,Cas1_4_CAS-I-II-III-IV-V-VI,Cas9_0_II                                                 | 1080 aa | MANLVLGLDGVSSVGGWIGDKTNEVDAGVRFEEATRANAEERRSFRGARRLKRKRHRLEAEDFLQSNPDDVGGSDIPYRARYVGLSEELSKTELAALYHLKRRGTITDTPDEEDKTSGSELSTKEQLKRNAKKLEDKHVVIEQYKLVNNEVVRDHNFRKFTSDYVINEAKALLTQREYVHAIEDFEFEGIVALINNRQYTDVGGSKSPTPYGEVYFDENGELQHEITMINKMRGQYFTFDLIRPKKAYTAELPNLLNDLNLBFRDDEMDGLTHEEKELIKNHEKGSVTLKIAKLVGISNLDHAGARLNKTNKPFSEFLKLLKLTLDKGVDFEFPFNFLDQJALELTAESKARREELQJFEJAVGSPSDVAAGLVNDTSIEYHALSKKAMOLLEPELWETNQQMQLFTEHGLGKSLLEQLQKESKQDFDEALISVARRAHEAKVTVAVRKHKEHLSPIVEMAREKNSDEAKSKYDYQKMGAFKEMAKLLDVKELDKLNGQMLAKLMSDQYKCTYQKGLPHDYNQYQFEDHIFYSYSDSDSQNKLVCYRQENQDQGMTPPYQSGKARRITDEFKACTNLFKSKKSKLNYLEQRDQHDHPEQKQFNIRRLVDTRYAMRSFNSTLRYFMNNDIDTKLVSIRGFSALRRRLRKHDRDHYAHADALIAAGITPILKQKSTDFNREGAVNTEGIVEKEDI FDSPTRDHHLWRMESEIKYSHVDRKPNRMTNQTLYSTREKDGQYVGVKKNYELDKGFDLSLKRDKDPDPSFLMAQHPKWTWELVVKVMDHSHADNPPQDFKQHGHIKDKGKVPYKGLYDNKIGHYDISHFPEKSRDVLVSRKSRIDVYQNDQEKYKLVGVPNWFTKEGDHYVLDKEEYVYGGELAAAPYQDSDSYVGYSFYKNDRIISFRPEKTRDIDTKNKKLVYQYKNIKRGDNDPRSTLEKSDKQKQFTIGTLRLDKKYNVDLGNIEYLEKEQDKIPSI                                                                                                                                                                    | [GTTCCGTTATACC AAAGATGAGAG AGTACCAAAAT]                                                                          | Qualified |
| GCA_007988845.1_ASM798884v1_ge nomic  | Csn2_10_CAS-II-A,Cas2_5_CAS-I-II-III-IV-V-VI,Cas1_4_CAS-I-II-III-IV-V-VI,Cas9_0_II                     | 1080 aa | MANRVLGLDGVSSVGGWIGDKTNEVDAGVRFEEATRANAEERRSFRGARRLKRKRHRLEAEDFLQSNPDDVGGSDIPYRARYVGLSEELSKTELAALYHLKRRGTITDTPDEEDKTSGSELSTKEQLKRNAKKLEDKHVVIEQYKLVNNEVVRDHNFRKFTSDYVINEAKALLTQREYVHAIEDFEFEGIVALINNRQYTDVGGSKSPTPYGEVYFDENGELQHEITMINKMRGQYFTFDLIRPKKAYTAELPNLLNDLNLBFRDDEMDGLTHEEKELIKNHEKGSVTLKIAKLVGISNLDHAGARLNKTNKPFSEFLKLLKLTLDKGVDFEFPFNFLDQJALELTAESKARREELQJFEJAVGSPSDVAAGLVNDTSIEYHALSKKAMOLLEPELWETNQQMQLFTEHGLGKSLLEQLQKESKQDFDEALISVARRAHEAKVTVAVRKHKEHLSPIVEMAREKNSDEAKSKYDYQKMGAFKEMAKLLDVKELDKLNGQMLAKLMSDQYKCTYQKGLPHDYNQYQFEDHIFYSYSDSDSQNKLVCYRQENQDQGMTPPYQSGKARRITDEFKACTNLFKSKKSKLNYLEQRDQHDHPEQKQFNIRRLVDTRYAMRSFNSTLRYFMNNDIDTKLVSIRGFSALRRRLRKHDRDHYAHADALIAAGITPILKQKSTDFNREGAVNTEGIVEKEDI FDSPTRDHHLWRMESEIKYSHVDRKPNRMTNQTLYSTREKDGQYVGVKKNYELDKGFDLSLKRDKDPDPSFLMAQHPKWTWELVVKVMDHSHADNPPQDFKQHGHIKDKGKVPYKGLYDNKIGHYDISHFPEKSRDVLVSRKSRIDVYQNDQEKYKLVGVPNWFTKEGDHYVLDKEEYVYGGELAAAPYQDSDSYVGYSFYKNDRIISFRPEKTRDIDTKNKKLVYQYKNIKRGDNDPRSTLEKSDKQKQFTIGTLRLDKKYNVDLGNIEYLEKEQDKIPSI                                                                                                                                                                    | [GTTCCGTTATACC AAAGATGAGAG AGTACCAAAAT]                                                                          | Qualified |
| MARD_SAMEA44539918_REFG_MM MP44539918 | Cas9_1_II,Cas1_4_CAS-I-II-III-IV-V-VI,Cas2_5_CAS-I-II-III-IV-V-VI,Cas3_0_I                             | 1059 aa | MSTMSYVILGLDGVASVGSVIEDENEPHRLVDLQVTRFEKAEVPTKQESLAKRSREARSIRRLARRVRLLLAKKALLFEGILTQNDFLTKSIKDLPINAWELRAGLDHKLTKSEWATVLLHLVKHVRGYSQRKNESDQADKQLGALLSGVKNHTHLLQENKYRTPAEALICFKFEKGEHNRNGEYHTDRDLQAEHLLEKQRFQNNPYASAKLEEKMDYLLMYQKAPLSEGAIKMLKGCSEFQYKCAKNTYASERFVLLKLNLLNLTQSGERGLTESERALLNQPYQAKLTYQVNRNLESESEFKGLRYGNVEDKMIKTELMLKAFHQKRVLEKANLKEWGLATKPEIDGHTSLYKTDADTALQDQKISAPLNLGAINFKRNLNLVYMDERNDKLTDEKHLNLLFKKQKSAPTLNKIAKLEKVEEDKGRVDDKDKPESTIKYHDIKGTINPELLENPDVLDKIAELVWQNEKHLLEELQLNLNEQDQRRVYANLQYTGHTSLKLLKQLNSELWESTLNMHGSIANNRPPKMEFGDKJIPDVPDVEDWLSAPKRSLSQIKVYVNEIKYQCEPKDIEALRENSDDKPKDKLQKSDKQKNEQVRAIKSENGDQNFSSSFEKYLWHLQDGLCMYSIESIKIDQLQNPAYVEDHIFHSYSDSDSNNKVLFCFANMNEQKQKSTPYEMMQNGHGQSFASLKAMVAKNKRMDNTKKNLLFTELSDIDVRRKFIARNLVDTRYASRVNLELQPFVKGQNDLTKVTVVRGKFTVLRKRWSINKTRDTHHHADAIAVAVPTLIRWKKENAVIHPKQVEHLEDEPTGELDKETFEREAYTPPHLEEDVRLQAPTRIKETHQVDDKMNRSKIDATYSTROVQLGDKDQPADYVLDKIKDYSVDGKVFVETKDDAKFMMYRIDPKTEHLLQVATYDVEEVLSPNGKVRQEVSEPLVYRQNGVWVKYKQKQNGPAVQLAYYKLLKSGKIDITPKNFKGKVVQLSLSPWRTDYNDVTSYEMGKISYDLTGKCGYQKREKREYEEKTDEKVASAESCFMFLSYRNRKIVDVTDETEVLLFSGRLTNPQKGYVLEKPKDKAKFDSKEVVSFGVTPNGQHKRFLKKNYLLKYINTDVLGNPFYVKKEGENRFDIIDDN | [GTAGAAATACAC GCGCTGTTTCAAA GGGATTAAGAC][GTAGAAATACAC GCGCTGTTTAAAGGGATTGACAC][ATTGAGCATGCAAAATGAGAAAGGACTACAAC] | Qualified |
| MARD_SAMN10362902_REFG_MM P10362902   | Csn2_8_CAS-II-A,Cas2_9_CAS-I-II-III-IV-V-VI,Cas1_4_CAS-I-II-III-IV-V-VI,Cas9_0_II,Csx19_2_CAS-III-D    | 1059 aa | MKHSQGYLGLDGVASVGSVIEDENEPHRLVDLQVTRFEKAEVPTKQESLAKRSREARSIRRLARRVRLLLAKKALLFEGILTQNDFLTKSIKDLPINAWELRAGLDHKLTKSEWATVLLHLVKHVRGYSQRKNESDQADKQLGALLSGVKNHTHLLQENKYRTPAEALICFKFEKGEHNRNGEYHTDRDLQAEHLLEKQRFQNNPYASAKLEEKMDYLLMYQKAPLSEGAIKMLKGCSEFQYKCAKNTYASERFVLLKLNLLNLTQSGERGLTESERALLNQPYQAKLTYQVNRNLESESEFKGLRYGNVEDKMIKTELMLKAFHQKRVLEKANLKEWGLATKPEIDGHTSLYKTDADTALQDQKISAPLNLGAINFKRNLNLVYMDERNDKLTDEKHLNLLFKKQKSAPTLNKIAKLEKVEEDKGRVDDKDKPESTIKYHDIKGTINPELLENPDVLDKIAELVWQNEKHLLEELQLNLNEQDQRRVYANLQYTGHTSLKLLKQLNSELWESTLNMHGSIANNRPPKMEFGDKJIPDVPDVEDWLSAPKRSLSQIKVYVNEIKYQCEPKDIEALRENSDDKPKDKLQKSDKQKNEQVRAIKSENGDQNFSSSFEKYLWHLQDGLCMYSIESIKIDQLQNPAYVEDHIFHSYSDSDSNNKVLFCFANMNEQKQKSTPYEMMQNGHGQSFASLKAMVAKNKRMDNTKKNLLFTELSDIDVRRKFIARNLVDTRYASRVNLELQPFVKGQNDLTKVTVVRGKFTVLRKRWSINKTRDTHHHADAIAVAVPTLIRWKKENAVIHPKQVEHLEDEPTGELDKETFEREAYTPPHLEEDVRLQAPTRIKETHQVDDKMNRSKIDATYSTROVQLGDKDQPADYVLDKIKDYSVDGKVFVETKDDAKFMMYRIDPKTEHLLQVATYDVEEVLSPNGKVRQEVSEPLVYRQNGVWVKYKQKQNGPAVQLAYYKLLKSGKIDITPKNFKGKVVQLSLSPWRTDYNDVTSYEMGKISYDLTGKCGYQKREKREYEEKTDEKVASAESCFMFLSYRNRKIVDVTDETEVLLFSGRLTNPQKGYVLEKPKDKAKFDSKEVVSFGVTPNGQHKRFLKKNYLLKYINTDVLGNPFYVKKEGENRFDIIDDN  | ATCTCACTTATAC TAAATTTCCGAGATGACTAAAAAC                                                                           | Qualified |



**Supplementary Table 3. The Om1Cas9 description, activity prediction and verification.**

| Supplementary Table 3a. Om1Cas9 ID and human codon-optimized Cas9 gene. |                                                                                                                                                                                                                                                                                                                                                                                                                                                                                                                                                                                                                                                                                                                                                                                                                                                                                                                                                                                                                                                                                                                                                                                                                                                                                                                                                                                                                                                                                                                                                                                                                                                                                                                                                                                                                                                                                                                                                                                                                                                                                                                                                                                                                                                                                                                                                                                                                                                                                                                                                                                                                                                                                                                                                                                                                                                                                                                                                                                                                                                                                                                                                                                                                                                                                                                                                                                                                                                                                                                                                                                                                                                                                                                                                                                                                                                                                         |
|-------------------------------------------------------------------------|-----------------------------------------------------------------------------------------------------------------------------------------------------------------------------------------------------------------------------------------------------------------------------------------------------------------------------------------------------------------------------------------------------------------------------------------------------------------------------------------------------------------------------------------------------------------------------------------------------------------------------------------------------------------------------------------------------------------------------------------------------------------------------------------------------------------------------------------------------------------------------------------------------------------------------------------------------------------------------------------------------------------------------------------------------------------------------------------------------------------------------------------------------------------------------------------------------------------------------------------------------------------------------------------------------------------------------------------------------------------------------------------------------------------------------------------------------------------------------------------------------------------------------------------------------------------------------------------------------------------------------------------------------------------------------------------------------------------------------------------------------------------------------------------------------------------------------------------------------------------------------------------------------------------------------------------------------------------------------------------------------------------------------------------------------------------------------------------------------------------------------------------------------------------------------------------------------------------------------------------------------------------------------------------------------------------------------------------------------------------------------------------------------------------------------------------------------------------------------------------------------------------------------------------------------------------------------------------------------------------------------------------------------------------------------------------------------------------------------------------------------------------------------------------------------------------------------------------------------------------------------------------------------------------------------------------------------------------------------------------------------------------------------------------------------------------------------------------------------------------------------------------------------------------------------------------------------------------------------------------------------------------------------------------------------------------------------------------------------------------------------------------------------------------------------------------------------------------------------------------------------------------------------------------------------------------------------------------------------------------------------------------------------------------------------------------------------------------------------------------------------------------------------------------------------------------------------------------------------------------------------------------|
| Assession                                                               | Genome: CNA0069409                                                                                                                                                                                                                                                                                                                                                                                                                                                                                                                                                                                                                                                                                                                                                                                                                                                                                                                                                                                                                                                                                                                                                                                                                                                                                                                                                                                                                                                                                                                                                                                                                                                                                                                                                                                                                                                                                                                                                                                                                                                                                                                                                                                                                                                                                                                                                                                                                                                                                                                                                                                                                                                                                                                                                                                                                                                                                                                                                                                                                                                                                                                                                                                                                                                                                                                                                                                                                                                                                                                                                                                                                                                                                                                                                                                                                                                                      |
| Host strain                                                             | <i>Staphylococcus warneri</i>                                                                                                                                                                                                                                                                                                                                                                                                                                                                                                                                                                                                                                                                                                                                                                                                                                                                                                                                                                                                                                                                                                                                                                                                                                                                                                                                                                                                                                                                                                                                                                                                                                                                                                                                                                                                                                                                                                                                                                                                                                                                                                                                                                                                                                                                                                                                                                                                                                                                                                                                                                                                                                                                                                                                                                                                                                                                                                                                                                                                                                                                                                                                                                                                                                                                                                                                                                                                                                                                                                                                                                                                                                                                                                                                                                                                                                                           |
| Nuclease name                                                           | Om1Cas9                                                                                                                                                                                                                                                                                                                                                                                                                                                                                                                                                                                                                                                                                                                                                                                                                                                                                                                                                                                                                                                                                                                                                                                                                                                                                                                                                                                                                                                                                                                                                                                                                                                                                                                                                                                                                                                                                                                                                                                                                                                                                                                                                                                                                                                                                                                                                                                                                                                                                                                                                                                                                                                                                                                                                                                                                                                                                                                                                                                                                                                                                                                                                                                                                                                                                                                                                                                                                                                                                                                                                                                                                                                                                                                                                                                                                                                                                 |
| Human codon optimized Cas9 Gene                                         | <p>ATGAAGGAGAAGTACATCTGGGCCTGGACCTGGGCATTACCAGCGTGGGATATGGCATTATCAACTTCGAG<br/>         ACAAAGAAGATATCGACGCCGGCTGAGACTGTCCCCGAAGCTAATGTGGATAACAACGAGGGCAGAAG<br/>         AAGCAAGAGAGGCAGCAGGAGACTGAAGAGAAGAAGAATCCACAGACTGGAGAGAGTGAAGCTGCTGTG<br/>         GACCGAGTACGACTGATCAACAAGGAGCAGATCCCCACCAGCAACAACCCCTACCAGATCAGAGTGAAG<br/>         GCCTGAGCGAGATCTGAGCAAGGACGAGCTGGCCATTGCCCTGCTTCATCTGGCTAAAAGAAGAGGCATC<br/>         CACAACATCAACGTGAGCAGCAGGAGCAGGACGCCAGCAATGAACTGAGCACCAGGAGCAGATCAACA<br/>         GAAACAACAAGCTGCTGAAGGACAAGTACGTGTGCGAGGTGCAGCTGCAGAGACTGAAGGAGGGCCAAAT<br/>         TAGACCGAGAGAAGAAGATCAAGACCACCGACATCCTGAAGGAGATCGACCAGCTGCTGAAGGTGCAG<br/>         AAGGACTACCACAACCTGGACATCGACTTCATCAACCAGTACAAGGAGATCGTGGAGACAAGAAGAGAGTA<br/>         CTTCCGAGGGCCCCGGCCAAGGCAGCCCTTTTGGATGGAATGGAGATCTGAAGAAGTGGTACGAGATGCTGA<br/>         TGGGCCACTGCACTACTTCCCCAGGAAGTGAAGGCGTGAAGTACGCCTATAGCCGCCGACCTGTTC AAC<br/>         GCCCTGAACGACCTGAATAACCTGATCATCCAGAGAGACAACAGCGAGAAGCTGGAGTACCACGAGAAGTA<br/>         CCACATCATCGAGAACGTGTTCAAGCAGAAGAAGAAGCCCACTGAAAGCAGATCGCCAAGGAGATCGGC<br/>         GTGAACCCCGAAGATATCAAGGGCTACAGAATCACAAGAGCGGCACCCCAATTCACCGAATTTAAGCTG<br/>         TACCACGACCTGAAGAGCATCGTGTTCGACAAGAGCATCTGGAGAACGAGGCCATCCTGGACCAGATCGC<br/>         CGAAATCCTGACCATCTACCAGGACGAGCAGAGCATCAAGGAGGAGCTGAACAAGCTGCCGAGATCCTGA<br/>         ACGAGCAGGACAAGGCCGAAATCGCCAAGCTGATCGGCTACAACGGCACCCACAGACTGAGCCTGAAGTG<br/>         CATCCACCTGATCAACGAGGAGCTGTGGCAGACCAGCAGAAACCAGATGGAGATCTTCAACTACCTGAACA<br/>         TCAAGCCCAACAAGGTGGACCTGAGCGAGCAGAACAAGATCCCCAAGGACATGGTGAACGACTTCATCTG<br/>         AGCCCGTGGTGAAGAGAACCTTATCCAGAGCATCAACGTGATCAACAAGGTGATCGAGAAGTACGGCAT<br/>         CCCCAGGACATCATCATCGAGCTGGCCAGAGAGAACAACAGCGACGACAGAAAGAAGTTTCATCAACAAC<br/>         CTGCAGAAGAAGAACGAGGCCACCAGAAAGAAGAATCAACGAGATCATCGGCCAGACCAGGCAACAGAAACG<br/>         CAAAAGAATCGTGGAGAAGATCAGACTGCACGACCAGCAGGAGGGCAAGTGCTGTACAGCCTTGAAG<br/>         CATTGCCCTGATGGACCTGTGAACAACCCAGAAATACGAGGTGGACCACATCATCCCAGAAAGCGTGGC<br/>         CTTTGGACAACAGCATCCAACAAGGTGCTGTGAGCAGATCGAGAACAGCAAGAAGGGCAACAGAACC<br/>         CCCTACCAGTACCTGAACAGCAGCGACGCCAACTGAGCTACAACCAGTTCAAGCAGCACATCTGAACCT<br/>         GAGCAAGAGCAAGGACAGAATCAGCAAGAAGAAGAAGGACTACCTGCTGGAGGAGAGAGACATCAACAA<br/>         GTTCGAGGTGCAGAAGGAGTTCATCAACAGAAACCTGGTGGACACCAGATACGCCACCAGAGAGCTGACC<br/>         AGTACCTGAAGGCCTACTTCAGCGCCAACACATGGACGTGAAGGTCAAGACCATCAACGGCAGCTTCAC<br/>         CAACCCTGAGAAAAGGTGTGGAGATTCGACAAGTACAGAAACCAGGCTACAAGCACCACGCCGAGGAC<br/>         GCTCTGATTATTGCCAATGCCGATTCCTGTTCAAGGAGAACAAGAAGCTGCAGAACGCCAACAAGATCCTG<br/>         GAGAAGCCACCATCGAGAACAACACCAAGAAGGTGACCGTGGAGAAGGAGGAGACTACAACAACCTG<br/>         TTCGAAAACCCCAAGCTGGTGGAGGACATTAAGCAGTACAGAGACTACAAGTTCAGCCACAGAGTGGACAA<br/>         GAAGCCAACAGACAGCTGATCAACGACACCCTGTACAGCACCAGAATGAAGGACGAGCAGCAGTACATC<br/>         GTGCAGACCATCACCGACATCTACGGCAAGGACAACAACCAACCTGAAGAAGCAGTTCAACAAGAACCCCG<br/>         AGAAGTTCCTGATGTACCAGAACGACCCCAAGACCTTCGAGAGCTGAGCATCATCATGAAGCAGTACAGC<br/>         GACGAGAAGAACCCCTGGCCAATACTACGAGGAAACCGGCAATACCTGACCAAGTACAGCAAGAAGA<br/>         ACAACGCCCCATCGTGAAGAAGATCAAGCTGCTGGGCAACAAGGTGGCAACCCTGGATGTGACAAA<br/>         CAAGTACGAGAACAGCACCAGAAGCTGGTGAAGCTGAGCATCAAGAACTACAGATTGAGCTGTACCTGA<br/>         CCGAGAAGGGCTACAAGTTCTGAGCACCATCGCCTACCTGAACGTTCAAGAAGGACAACACTACTACATCC<br/>         CCAAGGACAAGTACCAGGAGCTGAAGGAGAAGAAGAAGATCAAGGACACCGACCAAGTTCATCGCCAGCTT<br/>         CTACAAGAACGACCTGATCAAGCTGAACGGCGACCTGTACAAGATCATCGGCGTGAACAGCGACGACAGAA<br/>         ACATCATCGAGCTGGACTACTACGACATCAAGTACAAGGACTACTGCGAGATCAACAACATCAAGGGCGAG<br/>         CCCAGAATCAAGAAAACATCGGCAAAAAGACCGAGAGCATCGAGAAGTTCACCACCGACGTGCTGGGCA<br/>         ACCTGTACCTGCATAGCACCGAAAAGGCCCCAGCTGATTTCAAGAGAGGCCTG</p> |
| Cas9 Amino Acid                                                         | <p>MKEKYLGLDLGITSVGYGIINFETKIIDAGVRLFPEANVDNNEGRRSRKGRSRLKRRRIHRLERVKLLLEYDLI<br/>         NKEQIPTSNNPYQIRVKGLSEILSKDELAIALHLAKRRGIHNNVNSEDEDASNELSTKEQINRNNKLLKDKYVC<br/>         EVQLQRLKEGQIRGEKNRFTTDILKEIDQLLKVQKDYHNLIDIFINQYKEIVETRREYFEGPGQGSFPGWNGDL<br/>         KKWYEMLMGHCTYFPQELRSVKYAYSADLFLNALNDLNNLIQRDENSEKLEYHEKYHHIENVFKQKKKPTLKQIA<br/>         KEIGVNPEDIKYRITKSGTPOFTEFKLYHDLKSIIVDFKSIENEAILDQIAEILTYQDEQSIEKLELPEILNEQD<br/>         KAEIAKLIGYNGTHRLSLKCIHLINELWQTSRNQMEIFNYLNIKPNKVDLSEQNKIPKDMVNDFILSPVVKRTFI<br/>         QSINVINKVIEKYGIPEDIIIELARENNSDDRKKFINNLQKNEATRKRINEIIGQTGNQNAKRIVEKIRLHDDQEGK<br/>         CLYSLESIALMDLLNPNQNYEVDHIIIPRSVAFDINSIHNVKLVKQIENSKKGNRTPYQYLNSSDAKLSYNQFKQHIL<br/>         NLSKSKDRISKKKDYLLERDINKFEVQKEFINRNLVDTRYATRELTSLYKAYFSANNMDEVKVKTKTNSFNTNL<br/>         RKVWRFDKYRNHGYKHAEDALIANADFLFKENKLLQNANKILEKPTIENNTKKVTVKEEEDYNNVFETPKL<br/>         VEDIKQYRDYKFSHRVDKKNRQLINDTLYSTRMKDEHDYIVQITTDIYGKDNTNLKQFNKNPEKFLMYQNDP<br/>         KTFEKLSIIMKQYSDEKNPLAKYEEETGEYLYTKSKNNNGPIVKKIKLLGNKVGNHLDVNTNKYENSTKLVKLSI<br/>         KNYRFDVYLTEKGYKFTIAYLNVFKKDNYYIPKDKYQELKEKKIKIDTDQFIASFYKNDLIKLNGLDYKIIIGV</p>                                                                                                                                                                                                                                                                                                                                                                                                                                                                                                                                                                                                                                                                                                                                                                                                                                                                                                                                                                                                                                                                                                                                                                                                                                                                                                                                                                                                                                                                                                                                                                                                                                                                                                                                                                                                                                                                                                                                                                                                                                                                                                                                                                                                                                                                                                                                                                                                                                                                                                                                                                                                                                                                                                 |





| Editing Sites | F_primer                           | R_primer               |
|---------------|------------------------------------|------------------------|
| Om1Cas9 B1 T  | AAGACCTCTAacacaccagggtcaatacaact   | gggaagcttcacctcctttaca |
| Om1Cas9 B1 M  | CGTGCGATCCacacaccagggtcaatacaact   | gggaagcttcacctcctttaca |
| Om1Cas9 B2 T  | AGTTGCCATAacacaccagggtcaatacaact   | gggaagcttcacctcctttaca |
| Om1Cas9 B2 M  | CGTGCGATCCacacaccagggtcaatacaact   | gggaagcttcacctcctttaca |
| Om1Cas9 B3 T  | ATTCAACGGAAcacacaccagggtcaatacaact | gggaagcttcacctcctttaca |
| Om1Cas9 B3 M  | CGTGCGATCCacacaccagggtcaatacaact   | gggaagcttcacctcctttaca |
| Om1Cas9 B4 T  | AACTGTACTGccccagggtgcataagtaaga    | ctccatccaagagagcct     |
| Om1Cas9 B4 M  | TGAAGCGTTGccccagggtgcataagtaaga    | ctccatccaagagagcct     |
| Om1Cas9 B5 T  | GTACCTCAATgtagtgagatggctgaaaagc    | gtctgccagtcctcttacc    |
| Om1Cas9 B5 M  | GACTTCTAATgtagtgagatggctgaaaagc    | gtctgccagtcctcttacc    |
| Om1Cas9 H1 T  | TTAGATGCATtggaaactgctgaagggtgc     | atgactgaatcggaacaaggca |
| Om1Cas9 H1 M  | CCGATGTCGCtggaaactgctgaagggtgc     | atgactgaatcggaacaaggca |
| Om1Cas9 H2 T  | GTCCAGAGCTtggaaactgctgaagggtgc     | atgactgaatcggaacaaggca |
| Om1Cas9 H2 M  | CCGATGTCGCtggaaactgctgaagggtgc     | atgactgaatcggaacaaggca |
| Om1Cas9 H3 T  | CACGTGATAGccttgctcctctgtgaaat      | ccctccccacactatctcaat  |
| Om1Cas9 H3 M  | TCGGAAGGCAgcttgctcctctgtgaaat      | ccctccccacactatctcaat  |
| Om1Cas9 H4 T  | CCACTAGTCCgcttgctcctctgtgaaat      | ccctccccacactatctcaat  |
| Om1Cas9 H4 M  | TCGGAAGGCAgcttgctcctctgtgaaat      | ccctccccacactatctcaat  |
| Om1Cas9 H5 T  | TGGACTTGGCgcttgctcctctgtgaaat      | ccctccccacactatctcaat  |
| Om1Cas9 H5 M  | TCGGAAGGCAgcttgctcctctgtgaaat      | ccctccccacactatctcaat  |

**Supplementary Table 4. Information of the 121 candidate antimicrobial peptides.**

| <b>ID</b> | <b>cAMP sequence</b>                          | <b>Genome ID</b>                      | <b>Taxonomy</b>                    | <b>Verification*</b> |
|-----------|-----------------------------------------------|---------------------------------------|------------------------------------|----------------------|
| APD_25    | SCTTCVCTCSCCTT                                | GCA_002005165.1_ASM200516v1_genomic   | Novibacillus thermophilus          | APD3                 |
| APD_43    | WKSESLCTPGCVTGALQTCFLQTLTCNCKISK              | GCA_003667885.1_ASM366788v1_genomic   | Bacillus vallismortis              | APD3                 |
| APD_47    | TTWACATVTLTVTVCSPTGTLGCSGSMGTRGCC             | GCA_003846185.1_ASM384618v1_genomic   | Streptomyces                       | APD3                 |
| APD_94    | ITSVSWCTPGCTSEGGGSGCASHCC                     | MARD_SAMN03999371_REFG_MMP03999371    | Streptomyces sp001905385           | APD3                 |
| cAMP_1    | ITSKSLCTPGCITGILMCLTQNSCVSCNSCIRC             | GCA_000009785.1_ASM978v1_genomic      | Geobacillus thermoleovorans        | Fail                 |
| cAMP_2    | SVRPARAPRVNKTFASTLKWMAVSPVCFHFGCWSAFCSA       | GCA_000219105.1_ASM21910v1_genomic    | Myxococcus macrosporus             | Fail                 |
| cAMP_3    | GRCGTGCSGSQTRLCC                              | GCA_000219105.1_ASM21910v1_genomic    | Myxococcus macrosporus             | Non-effective        |
| cAMP_4    | ACGTGDGCKSTCASSCASAV                          | GCA_000220705.2_ASM22070v2_genomic    | Streptomyces xinghaiensis          | Non-effective        |
| cAMP_5    | GCATCSIGAACLVDGPIPDFEIAAGATGLFGLWG            | GCA_000264395.1_C89_version_1_genomic | Bacillus atrophaeus                | Fail                 |
| cAMP_6    | TTWACATITLTVTVCSPTGTLGCSGSMGTRGCC             | GCA_000743295.1_ASM74329v1_genomic    | Streptomyces globisporus_C         | Fail                 |
| cAMP_7    | GSGVLGTLGCCSCLPWYSGWTVCGLACNPGKPKCN           | GCA_000743295.1_ASM74329v1_genomic    | Streptomyces globisporus_C         | Non-effective        |
| cAMP_8    | FDTNTLTTSTISILISMTLGNNGWVCTATKECMPSCN         | GCA_000756615.1_ASM75661v1_genomic    | Paenibacillus durus                | Fail                 |
| cAMP_9    | DGGCGSTCGTSCVSNA                              | GCA_000829715.2_ASM82971v2_genomic    | Streptomyces platensis             | Fail                 |
| cAMP_10   | AICSPCPPRHCL                                  | GCA_000948975.1_ASM94897v1_genomic    | Thalassomonas actiniarum           | Non-effective        |
| cAMP_11   | IGFRNVLKKKNKFAIAWVGVSLAACLLASVLVVATGFGTP      | GCA_001015055.1_ASM101505v1_genomic   | Aneurinibacillus_A tyrosinisolvans | Fail                 |
| cAMP_12   | VTPSVVVSVITGFISTNCPSTACTRAC                   | GCA_001307105.1_ASM130710v1_genomic   | Bacillus australimaris             | Non-effective        |
| cAMP_13   | CSTNTFSLSDYWGNNGWCTISHECMSWCK                 | GCA_001307105.1_ASM130710v1_genomic   | Bacillus australimaris             | Fail                 |
| cAMP_14   | HYFETFWRSCVLSGGYWKWGIQEIC                     | GCA_001307105.1_ASM130710v1_genomic   | Bacillus australimaris             | Fail                 |
| cAMP_15   | GDVDPQTPSSVACGIAVSALFCPTTKCTSQC               | GCA_001307805.2_ASM130780v2_genomic   | Lentibacillus amyloliquefaciens    | Fail                 |
| cAMP_16   | SDVDPRWTPVISLVARIVKSTKACIGAGASAIISGIVSHNKDCLG | GCA_001456895.1_ASM145689v1_genomic   | Exiguobacterium_A indicum          | Non-effective        |
| cAMP_17   | THRDFLLTQCSSCTASSPIQCC                        | GCA_001482195.1_ASM148219v1_genomic   | Luteimonas abyssi                  | Non-effective        |
| cAMP_18   | SSSCSCSSCCSCTSSCCSSTSTGCGGG                   | GCA_001507315.1_ASM150731v1_genomic   | Micromonospora maris               | Fail                 |
| cAMP_19   | NNGGCETSRTSLCTDTLSTCC                         | GCA_001753705.1_ASM175370v1_genomic   | Streptomyces sp000424765           | Effective            |
| cAMP_20   | ASWWPWPICPTSCREVSCLRKTFINAVK                  | GCA_001767235.1_ASM176723v1_genomic   | Moorea producens_A                 | Non-effective        |
| cAMP_21   | ITSISACTPGCGNTGSFNSFCC                        | GCA_001884135.1_ASM188413v1_genomic   | Bacillus_A cereus_P                | Non-effective        |
| cAMP_22   | RTENLATFGCCFSPQFTYTSPILCVTL SVC               | GCA_001941645.1_ASM194164v1_genomic   | Actinoalloteichus sp001941625      | Fail                 |
| cAMP_23   | TTWPCFGITVSIACQGTKGYGSGVCC                    | GCA_001941645.1_ASM194164v1_genomic   | Actinoalloteichus sp001941625      | Non-effective        |
| cAMP_24   | CAWYDISCKLGNKGAWCTLTVEQCSSCN                  | GCA_001999205.1_ASM199920v1_genomic   | Bacillus velezensis                | Fail                 |
| cAMP_26   | IPKISHNLQCT                                   | GCA_002154725.1_ASM215472v1_genomic   | Aulosira sp002154725               | Non-effective        |
| cAMP_27   | GQGWTGLVSSLSYGYVGLGNNGNFCTATAECQNNCK          | GCA_002382885.1_WZ.A104_genomic       | Streptomyces sp002382885           | Non-effective        |
| cAMP_28   | LDTISIIKTTKLTATKVTCKSTCTCNCTNYCSILC           | GCA_002744245.1_ASM274424v1_genomic   | Bacillus pumilus_M                 | Fail                 |

|         |                                             |                                     |                                |               |
|---------|---------------------------------------------|-------------------------------------|--------------------------------|---------------|
| cAMP_29 | DNGGCATSRTSLCTDTLSGCC                       | GCA_002754675.1_ASM275467v1_genomic | Streptomyces sp002754675       | Fail          |
| cAMP_30 | GQGWGTIVSSLSCYGASYVLGNNGNFCTATAECQNNCK      | GCA_002832675.1_ASM283267v1_genomic | Streptomyces filamentosus      | Non-effective |
| cAMP_31 | RRGSPNWPPRRACG                              | GCA_002846525.1_ASM284652v1_genomic | Micromonospora echinofusca     | Effective     |
| cAMP_32 | SSEPQGTPIIPVSLAICPTTKCASVVKPCND             | GCA_002849835.1_ASM284983v1_genomic | Virgibacillus dokdonensis      | Fail          |
| cAMP_33 | SCTTCECCSCSS                                | GCA_002895405.1_ASM289540v1_genomic | Actinoalloteichus cyanogriseus | Fail          |
| cAMP_34 | SKKSKPGDGKFRGVRKRG                          | GCA_002993925.1_ASM299392v1_genomic | Bacillus paralicheniformis     | Non-effective |
| cAMP_35 | GLYTSTCYTSSCYTSTCYTSTCYSSDCYTGQNMCGYHTSSC   | GCA_003313305.1_ASM331330v1_genomic | Vallitalea guaymasensis        | Fail          |
| cAMP_36 | NNGGCATSRTSLCTDTLSGCC                       | GCA_003323715.1_ASM332371v1_genomic | Streptomyces                   | Fail          |
| cAMP_37 | LPTRVPSCFHP                                 | GCA_003326795.1_ASM332679v1_genomic | Thalassospira                  | Non-effective |
| cAMP_38 | ERFGWLSLALRC                                | GCA_003410355.1_ASM341035v1_genomic | Bacillus_A anthracis           | Non-effective |
| cAMP_39 | GCSTSSCSCSSTTSCTSTASCA                      | GCA_003432485.1_ASM343248v1_genomic | Spirillospora                  | Fail          |
| cAMP_40 | STLSLLSCVSAASVTLCL                          | GCA_003443735.1_ASM344373v1_genomic | Streptomyces sviveus           | Fail          |
| cAMP_41 | GWVGHWWDFNGWRDW                             | GCA_003626645.1_ASM362664v1_genomic | Streptomyces                   | Non-effective |
| cAMP_42 | ADCANVCTWTKDCSICPSWSCWSWSC                  | GCA_003667765.1_ASM366776v1_genomic | Bacillus_AZ                    | Non-effective |
| cAMP_44 | ASSGNICTATTECTYWSAICC                       | GCA_003833015.1_ASM383301v1_genomic | Hungatella                     | Fail          |
| cAMP_45 | VTSVSLCTPGCITGVIMTCTIKTATCGCHVAGK           | GCA_003833015.1_ASM383301v1_genomic | Hungatella                     | Non-effective |
| cAMP_46 | CTATCAWTCATSIEQQ                            | GCA_003846185.1_ASM384618v1_genomic | Streptomyces                   | Fail          |
| cAMP_48 | GSGVLGTLGCCSCLPWYSGWTVCGGLACDPGKPKCN        | GCA_003846185.1_ASM384618v1_genomic | Streptomyces                   | Non-effective |
| cAMP_49 | CTRTCTWTCITSIEQQ                            | GCA_003846255.1_ASM384625v1_genomic | Streptomyces anulatus_A        | Fail          |
| cAMP_50 | GEVRPQSGPVCAVTLAVCVVSLAFCPTTACTSDCR         | GCA_003856495.1_ASM385649v1_genomic | Thermoactinomycetaceae CDF     | Fail          |
| cAMP_51 | CDWWNISCHLGNTGRFCTLTKECQPNCNY               | GCA_003856495.1_ASM385649v1_genomic | Thermoactinomycetaceae CDF     | Non-effective |
| cAMP_52 | CDWWNISCHLGNTGQFCTLTKECQPSCNR               | GCA_003856495.1_ASM385649v1_genomic | Thermoactinomycetaceae CDF     | Effective     |
| cAMP_53 | AATRPNWRTSEPRWSTACRWCWGWSCWSPWSCSS          | GCA_004000405.1_ASM400040v1_genomic | Streptomyces bacillaris        | Fail          |
| cAMP_54 | NYTINCPTSSCYTSRCHSSTCYSSRCYTGQNRRCGYTSRC    | GCA_004115085.1_ASM411508v1_genomic | Paenibacillales                | Non-effective |
| cAMP_55 | KIAAYTSTCYTSTCYTSRCYTSNCYTSKCYTGQNMCGYTHSSC | GCA_004115085.1_ASM411508v1_genomic | Paenibacillales                | Fail          |
| cAMP_56 | QGRSGGATMGPLCKMPSLFCTYIMCL                  | GCA_004209775.1_ASM420977v1_genomic | Synechococcus_C                | Fail          |
| cAMP_57 | RIQCQWLPVLATHRA                             | GCA_004765815.2_ASM476581v2_genomic | Haloadaptaceae SW-6-65-15      | Effective     |
| cAMP_58 | RGPYLSLHYRCY                                | GCA_004765815.2_ASM476581v2_genomic | Haloadaptaceae SW-6-65-15      | Non-effective |
| cAMP_59 | GDVHAQTTWPCATVGVSVLALCPTTKCTSQC             | GCA_005671335.1_ASM567133v1_genomic | Bacillus_M okuhidensis         | Fail          |
| cAMP_60 | VNGACAWYNISCR LGNKGAYCTLTVECMPCSN           | GCA_005671335.1_ASM567133v1_genomic | Bacillus_M okuhidensis         | Fail          |
| cAMP_61 | CGTLGGTSCSYNGGCLCC                          | GCA_005954665.1_ASM595466v1_genomic | Lysobacter enzymogenes_B       | Fail          |
| cAMP_62 | QAMKPRS RPTPCVRAGACRGRQPRR                  | GCA_005954665.1_ASM595466v1_genomic | Lysobacter enzymogenes_B       | Non-effective |
| cAMP_63 | VTGFTAPGQSCCAGSNGTYTSSC                     | GCA_006149045.1_ASM614904v1_genomic | Dyadobacter                    | Non-effective |
| cAMP_64 | PEVNKEVVRGGAEDSDSAGWICTVSGECWGFSCNPFSRK     | GCA_006383075.2_ASM638307v2_genomic | Kordia                         | Fail          |



|         |                                            |                                     |                                  |               |
|---------|--------------------------------------------|-------------------------------------|----------------------------------|---------------|
| cAMP_65 | LQEDQLSNVKGGRVGVTCANASCANSCNQNSCNAQADQVLER | GCA_006491645.1_ASM649164v1_genomic | Flavobacterium                   | Non-effective |
| cAMP_66 | GRCSLCHC                                   | GCA_007004655.1_ASM700465v1_genomic | Cellvibrionaceae                 | Non-effective |
| cAMP_67 | GEQAPPSISTIATRVC TRVGCQVTKTCACTSMCTIFCVGGK | GCA_008312835.1_ASM831283v1_genomic | Streptomyces                     | Fail          |
| cAMP_68 | NDVNPETTPATTSSWTCITAGVTVSASLCPPTTKCTSRC    | GCA_009905595.1_ASM990559v1_genomic | Bacillus licheniformis           | Fail          |
| cAMP_69 | TITLSTCAILSKPLGNNGYLCTVTKECMPSCN           | GCA_009905595.1_ASM990559v1_genomic | Bacillus licheniformis           | Fail          |
| cAMP_70 | LFPVACHSLGFGGRAFACT                        | GCA_900473935.1_UW105_genomic       | Synechococcus_C sp002171995      | Non-effective |
| cAMP_71 | LRCSKFCLNPNCFITERSTIRCKIPR                 | GCA_902623005.1_AG-893-M05_genomic  | UBA9148                          | Non-effective |
| cAMP_72 | CDRGPAPHISQRC                              | GOMC.bin.11461                      | Pseudophaeobacter_A              | Non-effective |
| cAMP_73 | AGPGWVETLTKDCPWKQPGACVIIMGQKICKKCY         | GOMC.bin.11526                      | Bacillus_A toyonensis            | Non-effective |
| cAMP_74 | GAQRGPGTAVQNCGWVPLLTGNPT                   | GOMC.bin.12791                      | Burkholderiaceae SCGC-AAA027-K21 | Effective     |
| cAMP_75 | PEVNKDVVRGGLESDSAGWFCSVSGECWGFSCNPF        | GOMC.bin.13238                      | Kordia                           | Fail          |
| cAMP_76 | GQWAYTYKEG                                 | GOMC.bin.14155                      | Desulfocapsaceae                 | Non-effective |
| cAMP_77 | AAHFGRTISYCGACP                            | GOMC.bin.14222                      | Massilia                         | Non-effective |
| cAMP_78 | PSQAVCGKKRCFSISGGKWFIRKR                   | GOMC.bin.16027                      | Rhizobiales Im1                  | Fail          |
| cAMP_79 | SCTTCECCSCS                                | GOMC.bin.2032                       | Myxococota GCA-2862545           | Fail          |
| cAMP_80 | SAETQDITLPIDLCWLSRLGQNQGWFCITKECQVNCNVG    | GOMC.bin.2337                       | Oceanobacillus kimchii           | Fail          |
| cAMP_81 | TWCLWQTCETICINTCADTCVCSVGTGMCC             | GOMC.bin.4741                       | Deinobacteria UBA4055            | Fail          |
| cAMP_82 | AASSGWVCTVSGECNGGSSCNPFKDLPSFNEQR          | GOMC.bin.5307                       | Pseudoalteromonas                | Non-effective |
| cAMP_83 | SGSGDAIVPATTYCSIVATCHAR                    | GOMC.bin.5307                       | Pseudoalteromonas                | Non-effective |
| cAMP_84 | NSNWGTCTLDCLRCPTNGGTCGCPSGYGTCTVRGTGTGC    | GOMC.bin.6444                       | Ktedonobacteraceae               | Non-effective |
| cAMP_85 | ARPIVTTAITCTQYTWLNWKACCY                   | GOMC.bin.6501                       | Holophagae GCA-2747255           | Fail          |
| cAMP_86 | WRPVGVCRTP                                 | GOMC.bin.7566                       | Salinibacteraceae                | Non-effective |
| cAMP_87 | SLFRSIRSFRVRWVCLSHRRIK                     | GOMC.bin.7566                       | Salinibacteraceae                | Effective     |
| cAMP_88 | IPTGTVTWTPVCTNYGCL                         | GOMC.bin.8506                       | Nostocaceae                      | Non-effective |
| cAMP_89 | PLSAPPGSRCC                                | GOMC.bin.8611                       | Roseitalea                       | Effective     |
| cAMP_90 | RLFHFPDCIRCVSIEIPPVAGLCLRERKCSASTI         | GOMC.bin.8622                       | Tepidamorphus                    | Non-effective |
| cAMP_91 | QVLAKARCLPKSFNSKDCSKNSGYGWAVGEAARV         | GOMC.bin.8998                       | Pirellulaceae ARS98              | Non-effective |
| cAMP_92 | NILGGRPKNNGGCSWFSNATCSSESQAVCCSWQC         | MARD_SAMEA2272395_REFG_MMP2272395   | Fibrisoma limi                   | Fail          |
| cAMP_93 | SFCFFLQISAVKQC                             | MARD_SAMEA4707921_REFG_MMP4707921   | Synechococcus_C sp900473965      | Fail          |
| cAMP_95 | ERWRRPHAPVSPPPRWTRAARPGRPGTGRC             | MARD_SAMN03999384_REFG_MMP03999384  | Streptomyces sp001905905         | Effective     |
| cAMP_96 | LPGSCCSGLGGLVTILTFCGCTFGTN                 | MARD_SAMN03999393_REFG_MMP03999393  | Streptomyces sp001905725         | Fail          |
| cAMP_97 | CTTNTFSLSDALGNQGGWCTLTVECPNCN              | MARD_SAMN04026265_REFG_MMP04026265  | Streptomyces nanshensis_A        | Fail          |
| cAMP_98 | NLRGGTWTFTPTFGTGCNTGNTCTCDGGTIHNPSDCACP    | MARD_SAMN04488116_REFG_MMP04488116  | Muricauda flava                  | Non-effective |

|          |                                                                         |                                     |                                    |               |
|----------|-------------------------------------------------------------------------|-------------------------------------|------------------------------------|---------------|
| cAMP_99  | CTKTCTWTCRITSLEQQ                                                       | MARD_SAMN04571751_REFG_MMP04571751  | Streptomyces sp001687325           | Non-effective |
| cAMP_100 | KNLRVTSFILCTPGTCNNKCPNTNWLCNSVCVTKTCWTCA                                | MARD_SAMN05421791_REFG_MMP05421791  | Facklamia miroungae                | Non-effective |
| cAMP_101 | SLFWCTPGTCNNCKGDSLKSNCCGGSIICSLGGC                                      | MARD_SAMN05421791_REFG_MMP05421791  | Facklamia miroungae                | Non-effective |
| cAMP_102 | DAAPNTISITNPLIACALLSRNNTGRFCTVTVVECNVPGPVC                              | MARD_SAMN05421803_REFG_MMP05421803  | Nocardiopsis flavescens            | Fail          |
| cAMP_103 | RRFCGKTTCCGRRM                                                          | MARD_SAMN05421843_REFG_MMP05421843  | Litoreibacter meonggei             | Effective     |
| cAMP_104 | LQDSQMSSFKGGVREAEG LTCANGSCIKSCNRNSCKDQVIN                              | MARD_SAMN05444344_REFG_MMP05444344  | Tenacibaculum mesophilum           | Non-effective |
| cAMP_105 | ITSVSLCTPGCGETGSFNYSYCC                                                 | MARD_SAMN05444487_REFG_MMP05444487  | Marininema mesophilum              | Non-effective |
| cAMP_106 | GAKPGDGWISTITDDCPNSIIHCC                                                | MARD_SAMN05526266_REFG_MMP05526266  | Bacillus_AV solimangrovi           | Non-effective |
| cAMP_107 | GDGWISTITDDCPNSIIHCC                                                    | MARD_SAMN05526266_REFG_MMP05526266  | Bacillus_AV solimangrovi           | Non-effective |
| cAMP_108 | KCVTGGLCE                                                               | MARD_SAMN05660649_REFG_MMP05660649  | Desulfotruncus arcticus            | Non-effective |
| cAMP_109 | CGCPPGAGSVLCTPCPPLNCGA                                                  | MARD_SAMN06265352_REFG_MMP06265352  | Eilatimonas milleporae             | Non-effective |
| cAMP_110 | SITGGAEATLYDYTCSEGCPTDTNNNCTSGTSIVISCC                                  | MARD_SAMN10146989_REFG_MMP10146989  | Ulvibacterium marinum              | Fail          |
| cAMP_111 | GDVSGEFTTSPACVYVSVAAATRISSQKACAGAGSAVFSAISGAVAS<br>AVKC                 | OceanDNA-b17186                     | Paraclostridium benzoelyticum      | Fail          |
| cAMP_112 | GDVEPNLSLTAISAALTSAAATWAFSKDVVKCTKGNC                                   | OceanDNA-b17186                     | Paraclostridium benzoelyticum      | Fail          |
| cAMP_113 | GQVITASLVVPRHLTALCMPQTTLCCFLTSNQRVVVLLAARH<br>RRWC                      | OceanDNA-b33543                     | Algicoccus                         | Non-effective |
| cAMP_114 | WSGWWCTVSGECNGGVCCNPFSGDIKTLEQ                                          | OceanDNA-b3938                      | Cyclobacteriaceae                  | Fail          |
| cAMP_115 | NPHPWPVAPSRAPLAPCP                                                      | OceanDNA-b43                        | Thermoanaerobaculia<br>UBA5704     | Non-effective |
| cAMP_116 | RPSTPAKRHWVSKLLRCCWAARSAPSWPAGWGIAWGAAAY                                | OceanDNA-b44694                     | Stenotrophomonas<br>maltophilia_AJ | Effective     |
| cAMP_117 | QMKNINGGLIEIPICFSSCPNVGTTKSKSCCGSKCTKELEQF                              | OceanDNA-b6831                      | Flavobacterium                     | Non-effective |
| cAMP_118 | RVPCWSSHCKINVVSVNVVPSGNSKAGTRPVGLCGNTTALGSRS<br>AVTVSLICADKSRARRAILQMRA | OceanDNA-b33555                     | Algicoccus sp017857895             | NA            |
| cAMP_119 | PEQRDVVPRRTARIRGQVSLQVGARGGGRPADTECCSGGTVTCR<br>LPRWSSLFSCSEPLSDRALRNE  | GOMC.bin.8625                       | Haliangiaceae                      | NA            |
| cAMP_120 | WDETELVELSEADVHGGTGPACVATGLILGITAIQAGVATAVSA<br>AFCPTTKCSSRC            | GCA_002224125.1_ASM222412v1_genomic | Streptomyces sp002224125           | NA            |
| cAMP_121 | LVKGGTGNATLHSCPGQGNDPGGTCYTAGCGGGGTNGCNPSNP<br>CSGTSVFITC               | GOMC.bin.2081                       | Flavobacteriaceae                  | NA            |

\* Note: “APD3” means the peptides are verified in APD3 database<sup>34</sup>, “NA” means the peptides are longer than 50 aa and not subjected to synthesize, “Fail” means the peptides are synthesis failed, “Non-effective” means the peptides are non effective against multiple species, and “Effective” means the the peptides are non effective against at least one strain.

**Supplementary Table 5. Amino acid sequences of reference *IsPETase* and recovered candidate *dsPETases*.**

| Enzyme            | Accession No.                                                                      | Amino acid sequence*                                                                                                                                                                                                                                                                                                                                                                 |
|-------------------|------------------------------------------------------------------------------------|--------------------------------------------------------------------------------------------------------------------------------------------------------------------------------------------------------------------------------------------------------------------------------------------------------------------------------------------------------------------------------------|
| <i>IsPETase</i>   | WP_054022242                                                                       | <u>MNFPRASRLMQAAVLGGLMAVSAATAQT</u> NPYARGPNPTAASLEASAGPFTVRSFTVSRPSGYG<br>AGTVYYPTNAGGTVGAIIVPGYTARQSSIKWWGPRLASHGFVVITIDTNSLTDQPSSRSSQOMA<br>ALRQVASLNGTSSSPIYGVDTARMGVMGWSMGGGGSLISAANNPSLKAAPQAPWDSSTNFSS<br>VTVPTLIFACENDSIAPVNSSALPIYDSMSRNAKQFLEINGGSHSCANSNSNQALIGKKGVAWMK<br>RFMDNDTRYSTFACENPNSTRVSDFRANC                                                                  |
| <i>dsPETase01</i> | SAMN07748057<br>Mariana Trench: 4,000m                                             | <u>MKIIRTLGAGIAAVALGFGLLAPSASVA</u> AENDYERGPDPSTSSIEASRGPYA VSTKSSISFAARGFG<br>GGTIHYPTTTADGTFGVVAVSPGYTASESTIRWLGPRLASFGFVVITFDNSTRYDQPRARGTQLLA<br>AIDQAIGDSTVGSRIDPSRQAVVGHSMGGGGTLEAAKTRPSIEAAVGLTPWNLDKTWPEVEAAAL<br>QIGAQNDSVAPPRSHAVPFYGSLTNAERRAYLELRGASHFAPNTSNTTIKAYTLAWLKRYVDDDT<br>RYEQFLAPGPSTGFGSAVSDYRIQ                                                             |
| <i>dsPETase02</i> | SAMEA4473311<br>Pacific Ocean: North Su<br>vent: 2,107m                            | <u>MNLLRIKTLSSALIGLVLAGSFTTPSTVA</u> QDNDSGRYRPEGRTFARNAANMFDDRVEARTYETG<br>TNQEFASATIFYPLTSLFDPNGAVIMVPGYRGTTPVYDWWGPMLASIGVITMIETNPEDSLEA<br>RKNAFIAGVEFLRGENNADSPIRDKLDTGNIAIMGHSLLGGASLRAAEELASQIKAVIPLTPYCC<br>LGQPFEGDLSGVSVPTLIIASAEDIAAPPDGHARMLYDSVNASTKKVYLEFATGNHMLPSNSGQD<br>LETLTGYVYAFIKENFTDNPRYTDFFIGDGEEQFSIYETNQ                                                   |
| <i>dsPETase03</i> | SAMN07631021<br>Kermadec Trench:<br>9,177m                                         | <u>MLLALLFAACSTSVNRTGDPNISIASLSADGPYA</u> VRA YTSFPEVGEFADATIYYPLDAETPVGGV<br>AVSPGFTELQRAINWWGPRLASHGFVLLDITNEPRDSEPLRAEALISAVRLKKAENSRPDSPLNG<br>RIDVKNMAIMGHSMGGGGTLIAANNYSDEIQAAIPFTPWQPEGDFSQITVPTLVIAGAADRIAAVS<br>DHA WPHYQSLPHSTTRVYLEVAGGNHFLANSSGPDLS TIGRYGIAWLKLYLDGDERYRDFIYGEA<br>QKVDGTGKFSRYIANP                                                                     |
| <i>dsPETase04</i> | SAMN02727538<br>Atlantic Ocean: Mid<br>Cayman Rise<br>hydrothermal vent:<br>4,900m | <u>MANPYERGNPTDALLEASSGPFVSEENVSRLSAS</u> SGFGGGTIYYPRENNYGAVAISPGYTMNR<br>WLFPRALLLLFSLLLASCANSQPQTVESLSGDGEYQVMTYTDFFDPVPEFGDATIYYPLDTRGSIGG<br>VAISPQYTERQSHIEWWGPLLASHGYAVLVLDTNRRESTDLRADALIAAVTTLRAENTRNDSP<br>MGRIDGGKMAIMGHSMGGGGTLIAAHEHGEIEQAAIPFTPWEPDGFDPNITVPTLIIAGSIDRIAGV<br>DEHAWRHFQSIPESTTKVYMEIDGGNHYIADTDRGTDLATVGRYGI AWLKL YLDGDERYRDFIY<br>GEYHTPDMEKFSRYVTNP |
| <i>dsPETase05</i> | SAMEA4473313<br>Pacific Ocean: North Su<br>vent: 2,107m                            | <u>MKSGQHQQKDTVMKTPLFKLAALTLGVSLSSVALA</u> TNPGGGGGSNPDTGTGFPVSSFSADGS<br>FATTSGSAGLSCTVFRPSTLGLANGLKHPII V WNGT TASPSTYSGILEHWASHGFV V I AANTS NAG<br>TGQDMLNCVDYLTQNNRSTGTYANKLDLNRIGAAGHSQGGGGTIMAGQDYRIKVTAPFPYTI<br>GLGHNSSQSNQNGPMLMTGSADTIASPTLNALPVYNRANVPVFWGELSGASHFEPVGSAGDFR<br>GPSTAWFRYHLMDDASAEDTFYGSNCDLCTDNDWDVRRKGIN                                               |
| <i>dsPETase06</i> | SAMN07748060<br>Mariana Trench:<br>10,400m                                         | <u>MSVSLK GALRVLPLAASVALVGC</u> FGGGDPEPGPDGQALTNPGEYEICSYETDLENSGYASARMT<br>YPCDLSDGYPATTLTGGFNTKEQMEWLAEHLTTHGYVVLTMTPNNTLGVPPGWRDAQLGGF<br>AELADENARSNPLK GKIDLSKR NIMGFSMGGGVILAAEEMGDAPSAIALAPWL GAYNV DYS<br>QIETPMLMLGSENDELA YYTEDYYAQLPADL ERGV AIYAGASHFDWYGVNNQDQKAQFRTLVT<br>AFLEVQLKGDTSAYSYFDGAEHDEHVQEGWFSAFDYQK                                                      |

\*The underlined sequences indicate the N-terminal signal peptides predicted by SignalP 5.0, which were truncated in the cloning process.

**Supplementary Table 6. The taxonomy and keywords used to collect marine bacterial and archaeal genomes from public databases.**

| NCBI_taxonomy                  | NCBI_taxid | EBI/JGI Keywords |
|--------------------------------|------------|------------------|
| algae_metagenome               | 1300146    | ocean            |
| ballast_water_metagenome       | 1954210    | seawater         |
| beach_sand_metagenome          | 412757     | sea-water        |
| brine_metagenome               | 1981201    | sea              |
| cetacean_metagenome            | 1822005    | marine           |
| ciliate_metagenome             | 1969832    | bay              |
| cold_seep_metagenome           | 1583376    | coast            |
| coral_metagenome               | 496922     | deepsea          |
| coral_reef_metagenome          | 471232     | deep-sea         |
| crab_metagenome                | 1660082    | coral            |
| crustacean_metagenome          | 1681198    | shore            |
| ctenophore_metagenome          | 1508044    | seashore         |
| desalination_cell_metagenome   | 1983455    | microalgal       |
| dinoflagellate_metagenome      | 1579005    | algal            |
| echinoderm_metagenome          | 1411990    | hydrothermal     |
| estuary_metagenome             | 1649191    | estuary          |
| eukaryotic_plankton_metagenome | 2315767    | seep             |
| flotsam_metagenome             | 1602165    | brine            |
| gill_metagenome                | 1455666    | trench           |
| glacier_metagenome             | 1651087    | mangrove         |
| hydrothermal_vent_metagenome   | 652676     | pelagic          |
| hydrozoan_metagenome           | 1941281    | Atlantic         |
| invertebrate_gut_metagenome    | 1775950    | Antarctic        |
| invertebrate_metagenome        | 1711999    | Arctic           |
| jellyfish_metagenome           | 1549733    | Pacific          |
| lagoon_metagenome              | 1763544    | phytoplankton    |
| macroalgae_metagenome          | 2015907    | Mariana          |
| mangrove_metagenome            | 1284368    |                  |
| marine_metagenome              | 408172     |                  |
| marine_plankton_metagenome     | 1874687    |                  |
| marine_sediment_metagenome     | 412755     |                  |
| microbial_mat_metagenome       | 527640     |                  |

---

|                        |         |  |
|------------------------|---------|--|
| mollusc_metagenome     | 1417798 |  |
| oyster_metagenome      | 1541066 |  |
| periphyton_metagenome  | 1825055 |  |
| sand_metagenome        | 1671699 |  |
| sea_anemone_metagenome | 1825923 |  |
| sea_squirt_metagenome  | 1041057 |  |
| sea_urchin_metagenome  | 1873886 |  |
| seagrass_metagenome    | 1904484 |  |
| seawater_metagenome    | 1561972 |  |
| sediment_metagenome    | 749907  |  |
| shrimp_gut_metagenome  | 1588881 |  |
| sponge_metagenome      | 1163772 |  |
| starfish_metagenome    | 2053188 |  |
| surface_metagenome     | 1774230 |  |
| tidal_flat_metagenome  | 1269027 |  |
| whale_fall_metagenome  | 412756  |  |
| zebrafish_metagenome   | 1331678 |  |

---

## Supplementary References

- 1 Wood, D. E., Lu, J. & Langmead, B. Improved metagenomic analysis with Kraken 2. *Genome Biology* **20**, 257, doi:10.1186/s13059-019-1891-0 (2019).
- 2 Lu, J., Breitwieser, F. P., Thielen, P. & Salzberg, S. L. Bracken: estimating species abundance in metagenomics data. *PeerJ Computer Science* **3**, e104 (2017).
- 3 Stuart, T. *et al.* Comprehensive integration of single-cell data. *Cell* **177**, 1888-1902.e1821, doi:10.1016/j.cell.2019.05.031 (2019).
- 4 Becht, E. *et al.* Dimensionality reduction for visualizing single-cell data using UMAP. *Nature Biotechnology* **37**, 38-44, doi:10.1038/nbt.4314 (2019).
- 5 McMurdie, P. J. & Holmes, S. phyloseq: an R package for reproducible interactive analysis and graphics of microbiome census data. *PLoS one* **8**, e61217 (2013).
- 6 R Core Team. R: A language and environment for statistical computing (2013).
- 7 Shannon, C. E. A mathematical theory of communication. *The Bell System Technical Journal* **27**, 379-423, doi:10.1002/j.1538-7305.1948.tb01338.x (1948).
- 8 Nielsen, F. On the Jensen-Shannon symmetrization of distances relying on abstract means. *Entropy (Basel, Switzerland)* **21**, doi:10.3390/e21050485 (2019).
- 9 pairwiseAdonis: Pairwise multilevel comparison using adonis. R package version 0.4 (2020).
- 10 Hijmans, R. J., Williams, E., Vennes, C. & Hijmans, M. R. J. Package ‘geosphere’. *Spherical trigonometry* **1** (2017).
- 11 Dixon, P. VEGAN, a package of R functions for community ecology. *Journal of Vegetation Science* **14**, 927-930 (2003).
- 12 Zweng, M. *et al.* World ocean atlas 2018, volume 2: salinity. (2019).
- 13 Locarnini, M. *et al.* World ocean atlas 2018, volume 1: Temperature. (2018).
- 14 Boeuf, D. *et al.* Metapangenomics reveals depth-dependent shifts in metabolic potential for the ubiquitous marine bacterial SAR324 lineage. *Microbiome* **9**, 172, doi:10.1186/s40168-021-01119-5 (2021).
- 15 Cullen, J. J. Subsurface chlorophyll maximum layers: enduring enigma or mystery solved? *Ann Rev Mar Sci* **7**, 207-239, doi:10.1146/annurev-marine-010213-135111 (2015).
- 16 Richter, D. J. *et al.* Genomic evidence for global ocean plankton biogeography shaped by large-scale current systems. *Elife* **11**, doi:10.7554/eLife.78129 (2022).
- 17 McInnes, L., Healy, J. & Melville, J. Umap: Uniform manifold approximation and projection for dimension reduction. *arXiv preprint arXiv:1802.03426* (2018).
- 18 Sunagawa, S. *et al.* Structure and function of the global ocean microbiome. *Science* **348**, 1261359, doi:10.1126/science.1261359 (2015).
- 19 Delmont, T. O. *et al.* Nitrogen-fixing populations of Planctomycetes and Proteobacteria are abundant in surface ocean metagenomes. *Nature Microbiology* **3**, 804-813, doi:10.1038/s41564-018-0176-9 (2018).
- 20 Zeng, X., Alain, K. & Shao, Z. Microorganisms from deep-sea hydrothermal vents. *Marine Life Science & Technology* **3**, 204-230, doi:10.1007/s42995-020-00086-4 (2021).
- 21 Zhou, Y. L., Mara, P., Cui, G. J., Edgcomb, V. P. & Wang, Y. Microbiomes in the Challenger Deep slope and bottom-axis sediments. *Nat Commun* **13**, 1515, doi:10.1038/s41467-022-29144-4 (2022).
- 22 Cabello-Yeves, P. J. *et al.* The microbiome of the Black Sea water column analyzed by shotgun and genome centric metagenomics. *Environ Microbiome* **16**, 5, doi:10.1186/s40793-021-00374-1 (2021).
- 23 Orakov, A. *et al.* GUNC: detection of chimerism and contamination in prokaryotic genomes. *Genome Biol* **22**, 178, doi:10.1186/s13059-021-02393-0 (2021).
- 24 Chaumeil, P. A., Mussig, A. J., Hugenholtz, P. & Parks, D. H. GTDB-Tk v2: memory friendly classification with the genome taxonomy database. *Bioinformatics* **38**, 5315-5316, doi:10.1093/bioinformatics/btac672 (2022).

- 25 Parks, D. H. *et al.* GTDB: an ongoing census of bacterial and archaeal diversity through a  
phylogenetically consistent, rank normalized and complete genome-based taxonomy. *Nucleic  
Acids Res* **50**, D785-D794, doi:10.1093/nar/gkab776 (2022).
- 26 Emms, D. M. & Kelly, S. OrthoFinder: solving fundamental biases in whole genome comparisons  
dramatically improves orthogroup inference accuracy. *Genome Biol* **16**, 157, doi:10.1186/s13059-  
015-0721-2 (2015).
- 27 Minh, B. Q. *et al.* IQ-TREE 2: New Models and Efficient Methods for Phylogenetic Inference in  
the Genomic Era. *Mol Biol Evol* **37**, 1530-1534, doi:10.1093/molbev/msaa015 (2020).
- 28 Mistry, J. *et al.* Pfam: The protein families database in 2021. *Nucleic Acids Res* **49**, D412-D419,  
doi:10.1093/nar/gkaa913 (2021).
- 29 Grafen, A. The phylogenetic regression. *Philos Trans R Soc Lond B Biol Sci* **326**, 119-157,  
doi:10.1098/rstb.1989.0106 (1989).
- 30 Ho, L. & Ane, C. A linear-time algorithm for Gaussian and non-Gaussian trait evolution models.  
*Syst Biol* **63**, 397-408, doi:10.1093/sysbio/syu005 (2014).
- 31 Pagel, M. Inferring the historical patterns of biological evolution. *Nature* **401**, 877-884,  
doi:10.1038/44766 (1999).
- 32 Benjamini, Y. & Hochberg, Y. Controlling the false discovery rate: a practical and powerful  
approach to multiple testing. *Journal of the Royal statistical society: series B (Methodological)* **57**,  
289-300 (1995).
- 33 David, L. A. & Alm, E. J. Rapid evolutionary innovation during an Archaean genetic expansion.  
*Nature* **469**, 93-96, doi:10.1038/nature09649 (2011).
- 34 Wang, G., Li, X. & Wang, Z. APD3: the antimicrobial peptide database as a tool for research and  
education. *Nucleic Acids Res* **44**, D1087-1093, doi:10.1093/nar/gkv1278 (2016).
